1 **SARS-CoV-2 infection in the lungs of human ACE2 transgenic mice causes severe**  
2 **inflammation, immune cell infiltration, and compromised respiratory function**

3  
4 Emma S. Winkler<sup>1,2\*</sup>, Adam L. Bailey<sup>2\*</sup>, Natasha M. Kafai<sup>1,2</sup>, Sharmila Nair<sup>1</sup>, Broc T. McCune<sup>1</sup>,  
5 Jinsheng Yu<sup>6</sup>, Julie M. Fox<sup>1</sup>, Rita E. Chen<sup>1,2</sup>, James T. Earnest<sup>1</sup>, Shamus P. Keeler<sup>1,4</sup>, Jon H.  
6 Ritter<sup>2</sup>, Liang-I Kang<sup>2</sup>, Sarah Dort<sup>5</sup>, Annette Robichaud<sup>5</sup>, Richard Head<sup>6</sup>, Michael J. Holtzman<sup>1,4</sup>,  
7 and Michael S. Diamond<sup>1,2,3,7</sup> ‡

8  
9  
10 Department of Medicine<sup>1</sup>, Pathology & Immunology<sup>2</sup>, and Molecular Microbiology<sup>3</sup> Washington  
11 University School of Medicine, St. Louis, MO 63110, USA. Division of Pulmonary and Critical Care  
12 Medicine<sup>4</sup>, Washington University School of Medicine, St. Louis, MO 63110, USA. <sup>5</sup>SCIREQ  
13 Scientific Respiratory Equipment Inc, Montreal (QC), Canada. <sup>6</sup>Department of Genetics,  
14 Washington University School of Medicine, St. Louis, MO 63110, USA. <sup>7</sup>The Andrew M. and Jane  
15 M. Bursky Center for Human Immunology & Immunotherapy Programs, Washington University  
16 School of Medicine, St. Louis, MO 63110, USA

17

18

19 \* Contributed equally

20

21

22 ‡ **Corresponding author:** Michael S. Diamond, M.D., Ph.D., [diamond@wusm.wustl.edu](mailto:diamond@wusm.wustl.edu)

23

24 **Figures: 5**

25

26 **ABSTRACT**

27           Severe Acute Respiratory Syndrome Coronavirus -2 (SARS-CoV-2) emerged in late 2019  
28 and has spread worldwide resulting in the Coronavirus Disease 2019 (COVID-19) pandemic.  
29 Although animal models have been evaluated for SARS-CoV-2 infection, none have recapitulated  
30 the severe lung disease phenotypes seen in hospitalized human cases. Here, we evaluate  
31 heterozygous transgenic mice expressing the human ACE2 receptor driven by the epithelial cell  
32 cytokeratin-18 gene promoter (K18-hACE2) as a model of SARS-CoV-2 infection. Intranasal  
33 inoculation of SARS-CoV-2 in K18-hACE2 mice results in high levels of viral infection in lung  
34 tissues with additional spread to other organs. Remarkably, a decline in pulmonary function, as  
35 measured by static and dynamic tests of respiratory capacity, occurs 4 days after peak viral titer  
36 and correlates with an inflammatory response marked by infiltration into the lung of monocytes,  
37 neutrophils, and activated T cells resulting in pneumonia. Cytokine profiling and RNA sequencing  
38 analysis of SARS-CoV-2-infected lung tissues show a massively upregulated innate immune  
39 response with prominent signatures of NF- $\kappa$ B-dependent, type I and II interferon signaling, and  
40 leukocyte activation pathways. Thus, the K18-hACE2 model of SARS-CoV-2 infection  
41 recapitulates many features of severe COVID-19 infection in humans and can be used to define  
42 the mechanistic basis of lung disease and test immune and antiviral-based countermeasures.  
43

## 44 INTRODUCTION

45 Severe Acute Respiratory Syndrome Coronavirus-2 (SARS-CoV-2) is the recently  
46 emerged RNA virus responsible for the Coronavirus Disease 2019 (COVID-19) pandemic. Clinical  
47 disease is variable, ranging from asymptomatic infection to multi-organ failure and death, with a  
48 case-fatality rate of ~5%. The binding of the SARS-CoV-2 spike protein to human angiotensin-I  
49 converting enzyme-2 (hACE2) targets the virus to type II pneumocytes within the lung, resulting  
50 in injury, inflammation, and subsequent respiratory distress<sup>1,2</sup>. Other COVID-19 manifestations  
51 (e.g. cardiac dysfunction, coagulopathy, and gastrointestinal tract symptoms) suggest that extra-  
52 pulmonary sites of infection contribute to disease pathogenesis in some patients<sup>3</sup>.

53 The development of countermeasures that reduce COVID-19 morbidity and mortality is a  
54 priority for the global research community, and animal models are essential for this effort.  
55 Although several animal species used in laboratory research have been evaluated for  
56 susceptibility to SARS-CoV-2 infection, none have recapitulated the severe disease seen in  
57 hospitalized human cases. Hamsters, ferrets, and non-human primates develop mild to moderate  
58 viral disease and recover spontaneously<sup>4,5</sup>. Conventional laboratory strains of mice cannot be  
59 infected efficiently by SARS-CoV-2 because hACE2 but not mouse ACE2 supports SARS-CoV-  
60 2 binding<sup>6,7</sup>. Multiple strategies for introducing hACE2 into mice have been developed including  
61 (1) transient introduction of hACE2 via adenoviral viral vectors<sup>8</sup>, (2) expression of hACE2 as a  
62 transgene driven by heterologous gene promoters<sup>9,10</sup>, or (3) expression of hACE2 by the mouse  
63 ACE2 promoter<sup>11,12</sup>. While these animals all support SARS-CoV-2 infection, none cause severe  
64 disease or lethality. Thus, an animal model is still urgently needed for understanding the biology  
65 of severe SARS-CoV-2 infection and evaluating the efficacy of countermeasures for COVID-19.

66 The K18-hACE2 transgenic (K18-hACE2) mice, in which hACE2 expression is driven by  
67 the epithelial cell cytokeratin-18 (K18) promoter<sup>13</sup>, were originally developed to study SARS-CoV  
68 pathogenesis and cause lethal infection<sup>9</sup>. Here, we evaluate heterozygous hACE2 transgenic  
69 mice as a model for severe COVID-19 disease. After intranasal SARS-CoV-2 inoculation, K18-

70 hACE2 mice rapidly lost weight starting at 4 days post infection (dpi) and began to succumb to  
71 disease at 7 dpi. High levels of viral RNA and infectious virus were detected in the lungs of infected  
72 animals at 2, 4, and 7 dpi by RT-qPCR, *in situ* hybridization, and plaque forming assays. Infection  
73 was accompanied by declines in multiple parameters of pulmonary function, substantial cellular  
74 infiltrates in the lung composed of monocytes, neutrophils, and activated T cells, high levels of  
75 pro-inflammatory cytokines and chemokines in lung homogenates, and severe interstitial and  
76 consolidative pneumonia. Because of its severe disease and intense immune cell infiltration, the  
77 K18-hACE2 model of SARS-CoV-2 infection may facilitate evaluation of immunomodulatory and  
78 antiviral drugs against COVID-19 and our understanding of immune-mediated mechanisms of  
79 pathogenesis.

80

81



## 82     **RESULTS**

83             **K18-hACE2 mice are highly susceptible to SARS-CoV-2 infection.** We inoculated 8-  
84 week-old heterozygous K18-hACE2 mice of both sexes via intranasal route with  $2.5 \times 10^4$  PFU of  
85 SARS-CoV-2 (strain 2019n-CoV/USA\_WA1/2020). Beginning at 4 days post-infection (dpi), K18-  
86 hACE2 mice demonstrated marked weight loss, and by 7 dpi most animals had lost approximately  
87 25% of their body weight (**Fig 1a**), with many becoming moribund. High levels of infectious SARS-  
88 CoV-2 (**Fig 1b**) and viral RNA (**Fig 1c**) were detected in lung homogenates at 2, 4, and 7 dpi,  
89 whereas lower levels were present in other tissues (*e.g.*, heart, spleen, kidney). Virtually no viral  
90 RNA was measured in gastrointestinal tract tissues or in circulation until 7 dpi in the serum and  
91 colon, and this was only in a subset of animals (**Fig 1d**). The tissues supporting SARS-CoV-2  
92 infection in this model mirrored the pattern of hACE2 expression, with the highest receptor levels  
93 in the lungs, colon, kidney, and brain (**Extended Data Fig 1a**). Levels of hACE2 declined in the  
94 lung over the course of infection (**Extended Data Fig 1b**), suggesting either receptor  
95 downregulation, hACE2 shedding, or death of hACE2-expressing cells after SARS-CoV-2  
96 infection. A subset of infected K18-hACE2 mice had high levels of viral RNA and infectious virus  
97 in the brain (**Fig 1d-e**), consistent with previous reports with SARS-CoV and SARS-CoV-2 in  
98 hACE2 transgenic mice<sup>9,12,14</sup>. As no infectious virus and only low levels of viral RNA were detected  
99 in the brain of the majority (60%) of animals, the observed clinical disease is more consistent with  
100 lung and not brain infection. Staining for viral RNA in brain tissue by *in situ* hybridization showed  
101 that only one of six animals was positive at 7 dpi.; this animal had disseminated infection  
102 throughout the cerebral cortex with noticeable sparing of the olfactory bulb and cerebellum  
103 (**Extended Data Fig 2**).

104             **Histopathological changes in the lung after SARS-CoV-2 infection.** Analysis of  
105 hematoxylin and eosin-stained lung sections from K18-hACE2 mice infected with SARS-CoV-2  
106 (**Fig 2a**) showed a progressive inflammatory process. At 2 dpi, we observed accumulation of  
107 immune cells confined predominantly to perivascular sites. By 4 dpi, these immune cell infiltrates

108 involved a greater area of the lung with focal collections into adjacent alveolar spaces with alveolar  
109 wall thickening. By 7 dpi, immune cells, including neutrophils and mononuclear cells were found  
110 throughout the lung in alveolar and interstitial locations along with interstitial edema and  
111 consolidation. To correlate histopathological findings with sites of SARS-CoV-2 infection, we also  
112 stained lung sections for viral RNA using *in situ* hybridization (**Fig 2b**). At 2 dpi, expression of  
113 SARS-CoV-2 RNA was localized predominantly to alveolar epithelial cells and a few airway  
114 epithelial cells. This pattern also was seen at 4 dpi, but with more diffuse spread throughout the  
115 lung. By 7 dpi, the level of viral RNA expression was diminished and associated with cellular  
116 debris and collapsed alveoli. No significant viral RNA signal was localized to immune cells.  
117 Together, these findings provide evidence of a progressive and widespread viral pneumonia with  
118 perivascular and pan-alveolar inflammation characterized by immune cell infiltration, edema, and  
119 lung consolidation.

120 **Extra-pulmonary histopathology after SARS-CoV-2 infection.** We examined  
121 additional tissues implicated in the pathogenesis of severe COVID-19 in humans, including the  
122 brain, heart, liver, kidney, and spleen. Brain tissues of K18-hACE2 mice with minimal detectable  
123 SARS-CoV-2 infection appeared normal, whereas the one brain with a high level of infection at 7  
124 dpi showed multiple foci of inflammatory cells (*e.g.*, neutrophils, lymphocytes, and monocytes)  
125 involving the meninges, the subarachnoid space, parenchymal blood vessels, and the brain  
126 parenchyma (**Extended Data Fig 3a**). Abnormalities were observed in 2 of 9 hearts at 4 dpi (*e.g.*,  
127 scattered hypereosinophilic cardiomyocytes with pyknotic nuclei) and most livers at 4 and 7 dpi  
128 (*e.g.*, areas of inflammatory cell infiltrates and hepatocyte loss) (**Extended Data Fig 3b-c**). In one  
129 kidney at 4 dpi, we observed focal acute tubular injury (**Extended Data Fig 3d**); otherwise, the  
130 kidneys showed no apparent abnormalities. The spleen in SARS-CoV-2-infected K18-hACE2  
131 mice appeared normal (**Extended Data Fig 3e**), and fibrin thrombi were not detected in any of  
132 the extra-pulmonary organs examined.

133           **Pathophysiology of SARS-CoV-2 infection.** To assess for clinically-relevant changes in  
134 physiology over the course of SARS-CoV-2 infection in K18-hACE2 mice, we measured clinical  
135 chemistry and hematological parameters from peripheral blood samples (**Fig 3**). Plasma levels of  
136 sodium, potassium, and chloride concentrations and the anion gap all trended slightly downward  
137 at 7 dpi (**Fig 3a-d**) whereas plasma bicarbonate noticeably increased (**Fig 3e**), possibly as a result  
138 of poor gas exchange resulting from lung pathology or decreased respiratory drive. Other plasma  
139 analytes including calcium, glucose, and blood urea nitrogen were unchanged (**Fig 3f-h**).  
140 Hematocrit and plasma hemoglobin levels increased later in the course of infection, possibly  
141 because of reduced water intake and hemoconcentration (**Fig 3i-j**). We also observed a modest  
142 prolongation in the prothrombin time at 7 dpi that was preceded by an increase in D-dimer  
143 concentrations on 2 and 4 dpi (**Fig 3k-l**).

144           We next examined the impact of SARS-CoV-2 infection on pulmonary and cardiac function  
145 using a treadmill stress-test to assess exercise tolerance (**Fig 3m**). Compared to mock-infected  
146 controls, at 4 dpi, a subset of SARS-CoV-2-infected K18-hACE2 mice began to show reduced  
147 exercise tolerance, as measured by decreased distance travelled. However, by 5 dpi, all infected  
148 K18-hACE2 mice had substantially reduced exercise tolerance compared to mock-infected  
149 animals or their own pre-infection baseline performance (**Fig 3m**).

150           To examine changes to the biophysical properties of the lung over the course of SARS-  
151 CoV-2 infection, we mechanically ventilated mice via tracheostomy and performed several forced-  
152 oscillation tests to determine various respiratory mechanics parameters (**Fig 3n-w**). Infected  
153 animals showed normal lung biomechanics at 2 and 4 dpi but had markedly abnormal values in  
154 most parameters at 7 dpi relative to mock-infected controls. These abnormalities included  
155 reduced inspiratory capacity as well as increased respiratory system resistance and elastance  
156 (**Fig 3n-p**). Collectively, these changes resulted in a downward deflection of the pressure-volume  
157 loop (**Fig 3r**) with concomitant decreases in static compliance (**Fig 3q**), the shape-describing K  
158 parameter (**Fig 3s**), and loop hysteresis (**Fig 3t**), which together indicate reduced lung compliance

159 and distensibility. Further analysis using broadband forced oscillation maneuvers<sup>15</sup> revealed that  
160 SARS-CoV-2 infected mice at 7 dpi had relatively normal Newtonian resistance (**Fig 3u**), which  
161 is primarily a reflection of resistance in larger conducting airways. In contrast, mice at 7 dpi had  
162 marked increases in tissue damping (**Fig 3v**) and elastance (**Fig 3w**); these parameters measure  
163 the dissipation and storage of oscillatory energy in parenchymal tissue and reflect tissue and  
164 peripheral airway resistance and elastic recoil (*i.e.*, tissue stiffness), respectively. The  
165 measurements of mechanical properties of the respiratory system suggest that SARS-CoV-2  
166 infection in K18-hACE2 mice predominantly causes disease in the alveoli and lung parenchyma,  
167 and not in the conducting airways, which is consistent with both our histopathological analysis in  
168 mice and measurements of pulmonary function in humans with viral pneumonia and respiratory  
169 failure including COVID-19<sup>16</sup>.

170 **The immune response to SARS-CoV-2 Infection in the lungs.** An excessive pro-  
171 inflammatory host response to SARS-CoV-2 infection is hypothesized to contribute to pulmonary  
172 pathology and the development of respiratory distress in some COVID-19 patients<sup>17</sup>. To evaluate  
173 the composition of the immune cell response in SARS-CoV-2-infected K18-hACE2 mice, we  
174 performed flow cytometric analysis on lung homogenates and bronchoalveolar lavage (BAL) fluid  
175 at three time points after intranasal virus inoculation (**Fig 4a-b, Extended Data Fig 4**). Consistent  
176 with our histopathological analysis, we observed increased numbers of CD45<sup>+</sup> immune cells in  
177 the BAL beginning at 2 dpi and in the lung at 4 dpi. The cellular infiltrates at 4 and 7 dpi in the  
178 lung were composed principally of myeloid cell subsets including Ly6G<sup>+</sup> neutrophils, Ly6C<sup>+</sup>  
179 monocytes, and CD11b<sup>+</sup>CD11c<sup>+</sup> dendritic cells. In the BAL fluid, monocyte numbers peaked at 4  
180 dpi, and levels of neutrophils and dendritic cells continued to rise through 7 dpi. Accumulation of  
181 monocytes in the BAL fluid coincided with a decrease in the number of tissue-resident alveolar  
182 macrophages, an observation consistent with scRNA-seq analysis of BAL fluid of patients with  
183 severe COVID-19 disease<sup>18,19</sup>. By 7 dpi, we also observed an increase in several lymphoid cell

184 subsets in the lung including NK1.1<sup>+</sup> natural killer cells,  $\gamma\delta$  CD3<sup>+</sup> T cells, CD3<sup>+</sup>CD4<sup>+</sup> T cells,  
185 CD3<sup>+</sup>CD8<sup>+</sup> T cells, and activated CD44<sup>+</sup>CD3<sup>+</sup>CD8<sup>+</sup> T cells (**Fig 4a**).

186 Extensive changes in cytokine profiles are associated with COVID-19 disease  
187 progression<sup>20-22</sup>. Compared to the lungs of uninfected K18-hACE2 control mice, we observed  
188 induction of *Ifnb*, *Il28*, *Ifng*, *Cxcl10*, *Cxcl11*, and *Ccl2* mRNA over the first week (**Fig 4c**) with  
189 highest expression occurring at 2 dpi for all cytokines except *Ifng* and *Ccl2*. We also measured  
190 protein levels in the lungs using a multiplex assay of 44 different cytokines and chemokines (**Fig**  
191 **4d, Extended Data Fig 5**). Although mRNA expression was highest at 2 dpi, almost all up-  
192 regulated pro-inflammatory cytokines (IFN $\beta$ , IL-6, CXCL10, CXCL9, CCL5, CCL12, TIMP-1,  
193 TNF $\alpha$ , and G-CSF), T cell-associated cytokines (IL-10, IFN $\gamma$ , and IL-2), and myeloid cell-  
194 associated chemokines (CCL2, CCL3, CCL4, CXCL1, and LIF) peaked at 7 dpi. These data are  
195 consistent with cytokine profiling of serum from human COVID-19 patients and transcriptional  
196 analysis of the BAL fluid of human patients, which showed that elevated levels of IL-10, IL-6, IL-  
197 2, IL-7, G-CSF, CXCL10, CCL2, CCL3, and TNF- $\alpha$  correlate with disease severity<sup>19,23-25</sup>. Overall,  
198 our data suggest that in the context of the inflammatory response to SARS-CoV-2 in the lungs of  
199 K18-hACE2 mice, many cytokines and chemokines are induced, with some having sustained  
200 expression and others showing rapid up-and down regulation patterns.

201 **Distinct transcriptional signatures are associated with early and late immune**  
202 **responses to SARS-CoV-2 infection.** Studies in other small animals and humans have reported  
203 cytokine signatures coupled with delayed type I interferon (IFN) signaling or elevated IFN  
204 signatures in the lung<sup>26,27</sup>. To assess how the kinetics of infection and ensuing inflammation  
205 modulate the cytokine and IFN response to SARS-CoV-2, we performed RNA sequencing of lung  
206 homogenates of K18-Tg mice at 0 (mock), 2, 4, and 7 dpi. Principal component analysis (PCA)  
207 revealed distinct transcriptional signatures associated at 7 dpi (**Fig 5a**) with overlapping  
208 signatures at 2 and 4 dpi. Hundreds of genes were differentially expressed at all time points  
209 compared to mock-infected animals (**Fig 5b**), many of these associated with IFN signaling, NF-

210 kB-dependent cytokine responses, or leukocyte activation. In agreement with the PCA, only 449  
211 differentially expressed genes were shared at all time points when compared to mock. In contrast,  
212 1,975 unique differentially expressed genes were identified between mock to 7 dpi whereas only  
213 59 and 152 genes were different between mock and 2 and 4 dpi, respectively (**Fig 5c**). Gene  
214 ontology analysis of the top upregulated genes at all time points showed enrichment of gene  
215 clusters in cytokine-mediated signaling, type I and II IFN signaling, neutrophil activation, and  
216 pathogen recognition receptor signaling (**Fig 5d**). Upregulation of gene sets involved in cytokine-  
217 mediated signaling, neutrophil activation, cellular responses to type II IFN, and toll-like receptor  
218 signaling were most pronounced at 7 dpi (**Fig 5e-g, Extended Data Fig 6a-c, Supplementary**  
219 **Table 1**). Of note, different genes in the type I IFN signaling pathway were upregulated at 2 and  
220 4 dpi (e.g., *Irf9*, *Irf7*, *Stat1*, and certain IFN-stimulated genes (ISGs) *Isg15*, *Mx1*, *Oas3*, *Ifit1*, *Ifit2*,  
221 *and Ifit3*) versus 7 dpi (e.g., *Ifnar1/2*, *Tyk2*, *Irf1* and certain ISGs *Samhd1*, *Oas2*, *and Ifitm1*). This  
222 suggests a temporally distinct type I IFN response (**Fig 5f**), which has been described previously  
223 with IFN $\alpha$  and IFN $\beta$  subtypes<sup>28-30</sup>. Alternatively, the differences in IFN and ISG signatures at early  
224 and late time points could reflect differential signaling contributions of type I and III IFNs, as these  
225 cytokines are both expressed in the lung after SARS-CoV-2 infection<sup>31</sup> and induce overlapping  
226 yet non-identical sets of ISGs<sup>32</sup>. Collectively, the RNA sequencing data from the lungs of K18-  
227 hACE2 mice show distinct immune signatures associated with early infection (days 2 and 4) and  
228 late (day 7) SARS-CoV-2 infection.  
229

## 230 DISCUSSION

231 In this study, we found that SARS-CoV-2 infection of K18-hACE2 transgenic mice causes  
232 severe pulmonary disease. After intranasal SARS-CoV-2 inoculation, K18-hACE2 mice rapidly  
233 lost weight after 4 dpi and began to succumb to disease at 7 dpi. High levels of viral RNA and  
234 infectious virus were detected in the lungs of infected animals at 2, 4, and 7 dpi by RT-qPCR, *in*  
235 *situ* hybridization, and plaque assay. Infection was accompanied by high levels of pro-  
236 inflammatory cytokines and chemokines in the lung and an impressive cellular infiltrate comprised  
237 primarily of monocytes, neutrophils, and T cells. The combined infection and inflammation  
238 resulted in severe interstitial pneumonia characterized by collapsed alveolar spaces. This caused  
239 detrimental changes in lung physiology including decreased exercise tolerance, reduced  
240 inspiratory capacity, and stiffening of the lung parenchyma.

241 SARS-CoV-2 infection is subclinical or mild in most human cases. A small, yet clinically  
242 important fraction develop life-threatening disease requiring hospitalization and intensive care.  
243 Mild disease is a feature of SARS-CoV-2 infection in naturally susceptible animals including  
244 hamsters, ferrets, cats, and non-human primates<sup>5</sup>. This is perhaps unsurprising given that the  
245 strongest risk factors for developing severe COVID-19 in humans (*e.g.*, old age, cardiovascular  
246 disease, and diabetes) are absent in many laboratory animals. Mild to moderate disease is seen  
247 in many rodent models of SARS-CoV-2 infection, including those expressing hACE2 via viral  
248 vectors or transgenes<sup>8,11,12,33</sup>. Thus, the severity of disease we observed following SARS-CoV-2  
249 infection of K18-hACE2 mouse is unique. As the onset of severe clinical disease in K18-hACE2  
250 mice occurs days after peak viral infection and is associated with high levels of infiltrating immune  
251 cells and inflammatory mediators in the lung, immune responses likely contribute to pathogenesis.

252 The histopathological changes we observed in the infected lungs of K18-hACE2 mice  
253 correlate with the impaired pulmonary function. Pneumocytes become infected early, which led  
254 to recruitment of leukocytes into the pulmonary interstitium, production of proinflammatory  
255 cytokines, injury to parenchymal cells, collapse of the alveolar space, and compromise of gas



256 exchange, all of which could cause the hypercapnia we observed at 7 dpi. This course is  
257 remarkably consistent with human disease in which rapid early viral replication is followed by  
258 inflammatory responses, which are believed to contribute to pathology, morbidity, and mortality<sup>34</sup>.

259 A fundamental understanding of the immunological processes that influence COVID-19  
260 disease is needed to select immunomodulatory interventions that target key cell types or  
261 pathways. We saw substantial immune cell accumulation in the lungs of K18-hACE2 mice, an  
262 observation consistent with post-mortem analysis of human patients<sup>35</sup>. Infiltrates were composed  
263 primarily of myeloid cells including monocytes and neutrophils as well as activated CD8<sup>+</sup> T cells  
264 and corresponded with high levels of chemokines that drive their migration. The lymphopenia  
265 associated with severe COVID-19 in humans is attributed in part to the immune cell migration into  
266 inflamed tissues<sup>21,36</sup>. In transcriptional analyses of BAL fluid from infected humans with severe  
267 COVID-19, an accumulation of CD8<sup>+</sup> T cells, neutrophils, and monocytes coincided with the loss  
268 of alveolar macrophages<sup>18,19</sup>. In our study, using cytokine analysis and RNA-sequencing of lung  
269 homogenates, we detected enhanced expression of several myeloid cell chemoattractants (e.g.,  
270 CCL2, CCL3, CCL4, CXCL1, and CXCL10) and other key inflammatory cytokines (TNF $\alpha$ , IL-6,  
271 and G-CSF) that correlate with COVID-19 disease severity in humans<sup>26,27</sup>. Given these parallel  
272 findings, studies in K18-hACE2 mice evaluating the role of specific immune pathways and cell  
273 subsets in disease pathogenesis could inform the selection of immunomodulatory agents for  
274 severe COVID-19.

275 The role of type I IFN in SARS-CoV-2 pathogenesis in this model warrants further  
276 investigation, as it has been suggested that a dysregulated type I IFN response contributes to  
277 excessive immunopathology. Indeed, in SARS-CoV infection, type I IFN signaling appears pro-  
278 inflammatory and not antiviral<sup>37</sup>. Our RNA sequencing analysis revealed differences in the type I  
279 IFN gene signatures associated with early and late SARS-CoV-2 infection. Given that ISGs can  
280 exert diverse functions apart from their antiviral activities, including inflammatory, metabolic, and  
281 transcriptional effects<sup>38</sup>, these two “early” and “late” ISG modules may have different functional



282 consequences following SARS-CoV-2 infection. Furthermore, how these temporally distinct  
283 programs are induced and regulated remains uncertain and may be the result of cell-type  
284 specificity, kinetics, and sensitivity to different type I or III IFN subtypes.

285         The development of severe disease following SARS-CoV-2 infection is an important  
286 feature of the K18-hACE2 model, although the precise reason for this susceptibility compared to  
287 other hACE2 transgenic models remains unknown. Potential explanations include a high number  
288 of hACE2 transgene insertions (<https://www.jax.org/strain/034860>) and/or the strength and  
289 cellular specificity of the K18 promoter. Human ACE2 is expressed in multiple tissues in the K18-  
290 hACE2 mouse<sup>9</sup>, which could allow for SARS-CoV-2 infection of multiple organs. While we  
291 detected viral RNA in several tissues, the lung was the most heavily infected and showed the  
292 most consistent and severe histopathological changes; these findings were anticipated given the  
293 known tropism of SARS-CoV-2 for the respiratory tract and the intranasal route of infection.  
294 Moderate levels of viral RNA also were found in the heart, kidney, and spleen, with peak titers at  
295 2 and 4 dpi, whereas levels in gastrointestinal tract tissues (duodenum, ileum, and colon) were  
296 lower. In the gastrointestinal tract of K18-hACE2 mice, hACE2 was expressed most abundantly  
297 in the colon, which correlated with infection seen at later time points. Although hACE2 is  
298 expressed in the gastrointestinal tract in other hACE2-expressing mice, productive infection was  
299 observed only upon intragastric inoculation or at early time points following intranasal  
300 infection<sup>11,12</sup>.

301         We observed dichotomous SARS-CoV-2 infection in the brain, with high virus levels in  
302 approximately 40% of mice at 7 dpi, and low levels in the remaining 60% of animals. Infection of  
303 the brain also was observed in K18-hACE2 mice infected with SARS-CoV<sup>9,14</sup> but occurred earlier  
304 (at 3 to 4 dpi) and more uniformly. Similar to the experiments with SARS-CoV, we did not detect  
305 SARS-CoV-2 in the olfactory bulb, which suggests that both SARS-CoV and SARS-CoV-2 cross  
306 the blood-brain barrier instead of traversing the cribriform plate and infecting neuronal processes  
307 near the site of intranasal inoculation<sup>39</sup>. Notwithstanding this data, and unlike SARS-CoV,

308 alterations in smell and taste are features of SARS-CoV-2 infection in humans<sup>40</sup>, suggesting that  
309 cell types within the olfactory system may be susceptible to infection or injury. More study is  
310 needed to clarify the routes SARS-CoV-2 dissemination throughout the host and particularly how  
311 it accesses the brain in some animals and humans.

312 While SARS-CoV-2 lung infection in K18-hACE2 mice provides a model for studying  
313 severe infection that recapitulates features of COVID-19 in humans, we acknowledge several  
314 limitations. The expression of the hACE2 transgene is non-physiological in several respects. It is  
315 driven by a non-native (*i.e.*, the cytokeratin-18) promotor, resulting in tissue expression levels that  
316 are distinct from endogenously-expressed ACE2. ACE2 expression in K18-hACE2 mice is  
317 independent of the complex regulatory systems that governs ACE2 levels<sup>41</sup>. As such, comorbid  
318 conditions (*e.g.*, obesity, hypertension, diabetes) that alter ACE2 expression in humans<sup>41</sup> likely  
319 cannot be modelled faithfully in this transgenic mouse.

320 In summary, we found that SARS-CoV-2 infection of K18-hACE2 transgenic mice supports  
321 robust viral replication in the lung, which leads to severe immune cell infiltration, inflammation,  
322 and pulmonary disease. Thus, the K18-hACE2 mouse is an attractive small animal model for  
323 defining the mechanisms of the pathogenesis of severe COVID-19 and may be useful for  
324 evaluating countermeasures that reduce virus infection or associated pathological inflammatory  
325 responses.

326

327

328 **ACKNOWLEDGEMENTS**

329 This study was supported by NIH contracts and grants (75N93019C00062 and R01  
330 AI127828, R01 AI130591, and R35 HL145242) and the Defense Advanced Research Project  
331 Agency (HR001117S0019). E. S. W. is supported by T32 AI007163, B.T.M is supported by F32  
332 AI138392, and L.K. is supported by T32 EB021955. We thank Sean Whelan, Susan Cook, and  
333 Jennifer Philips for facilitating the studies with SARS-CoV-2 in biosafety level-3, Cathleen Lutz  
334 and The Jackson Laboratory for providing mice, Arthur Kim for purifying the CR3022 anti-S mAb,  
335 Hana Janova and Matthew Cain for experimental advice, and Robert Schmidt for reviewing a  
336 brain histology slides. We also thank David Brunet at SCIREQ Inc. for facilitating use of the  
337 flexiVent mouse ventilator.

338

339 **AUTHOR CONTRIBUTIONS**

340 A.L.B. and E.S.W. performed the intranasal inoculations of SARS-CoV-2 and clinical  
341 analysis. E.S.W., J.M.F., and R.E.C. performed viral burden analysis with support of J.T.E..N.M.K.  
342 performed histopathological studies. B.T.M. performed *in situ* hybridization. S.P.K., J.H.R., L.K.,  
343 and M.J.H. analyzed the tissue sections for histopathology. S.N. and E. S. W. performed immune  
344 cell processing for flow cytometry and analysis. A.L.B. performed pulmonary mechanics analysis  
345 with training from S.D., and S.D. and A.R. performed analysis of pulmonary mechanics data.  
346 A.L.B. and N.M.K. performed treadmill stress-testing analyses. J.Y. and R.H. performed RNA  
347 sequencing and analysis. E.S.W. compiled all figures. A.L.B, E.S.W., and M.S.D. wrote the initial  
348 draft, with the other authors providing editing comments.

349

350 **DECLARATION OF INTERESTS**

351 M.S.D. is a consultant for Inbios, Eli Lilly, Vir Biotechnology, NGM Biopharmaceuticals,  
352 and on the Scientific Advisory Board of Moderna. The Diamond laboratory has received funding  
353 under sponsored research agreements from Moderna, Vir Biotechnology, and Emergent

354 BioSolutions. S.D. and A.R. are employed by SCIREQ Inc., a commercial entity having  
355 commercial interest in a subject area related to the content of this article. SCIREQ Inc. is an emka  
356 TECHNOLOGIES company. M.J.H. is a member of the DSMB for AstroZeneca and founder of  
357 NuPeak Therapeutics.

358

359

360 **FIGURE LEGENDS**

361 **Figure 1. SARS-CoV-2 infection in K18-hACE2 mice.** Eight to nine-week-old male and  
362 female K18-hACE2 transgenic mice were inoculated via the intranasal route with  $2.5 \times 10^4$  PFU  
363 of SARS-CoV-2. **a.** Weight change was monitored (two experiments,  $n = 10$ ; two-way ANOVA:  
364 \*\*\*  $P < 0.001$ , \*\*\*\*  $P < 0.0001$ , symbols represent the mean  $\pm$  SEM). **b-c.** Viral burden in the lungs  
365 was analyzed at 2, 4 and 7 dpi by plaque assay for infectious virus (**b**) and qRT-PCR for viral  
366 RNA levels (**c**). **d.** Viral RNA levels in indicated tissues (heart, brain, kidney, spleen, serum, and  
367 gastrointestinal tract) at 2, 4, and 7 dpi as measured by qRT-PCR. **e.** Viral burden in the brains  
368 as measured by plaque assay (two experiments,  $n = 10$ ). For **b-e**, bars represent the mean and  
369 the dotted line indicates the limit of detection.

370 **Figure 2. Histopathological analysis of SARS-CoV-2 infection in K18-hACE2 mice.**  
371 **a.** Hematoxylin and eosin staining of lung sections from K18-hACE2 mice following mock infection  
372 or after intranasal infection with  $2.5 \times 10^4$  PFU of SARS-CoV-2 at 2, 4, and 7 dpi. Images show  
373 low- (left; scale bars, 250  $\mu\text{m}$ ), medium- (middle; scale bars, 50  $\mu\text{m}$ ), and high-power  
374 magnification (right; scale bars, 25  $\mu\text{m}$ ). Representative images from  $n = 6$  per group. **b.** SARS-  
375 CoV-2 RNA *in situ* hybridization of lung sections from K18-hACE2 mice for conditions in (**a**).  
376 Images show low- (left; scale bars, 100  $\mu\text{m}$ ), medium- (middle; scale bars, 100  $\mu\text{m}$ ), and high-  
377 power magnification (right; scale bars, 10  $\mu\text{m}$ ). Representative images from  $n = 6$  per group.

378 **Figure 3. Functional consequences of SARS CoV-2 infection in K18-hACE2 mice. a-**  
379 **k.** Clinical chemistry and hematological parameters from the peripheral blood of mock-treated or  
380 SARS-CoV-2 infected animals at 2, 4, and 7 dpi (two experiments,  $n = 13-16$  per group; one-way  
381 ANOVA with Dunnett's test; \*  $P < 0.05$ ; \*\*\*  $P < 0.001$ ; \*\*\*\*  $P < 0.0001$ , bars represent the mean,  
382 and the dotted line indicates the mean value of the mock-treated group). **l.** Serum D-dimer levels  
383 of mock-treated or SARS-CoV-2 infected animals at 2, 4, and 7 dpi (two experiments,  $n = 5$  per  
384 group; one-way ANOVA with Dunnett's test; \*  $P < 0.05$ ; \*\*\*  $P < 0.001$ ; \*\*\*\*  $P < 0.0001$ , bars  
385 represent the mean, and the dotted line indicates the mean value of the mock-treated group).

386 Asterisks indicate statistical significance compared to mock infection. **m.** Results of a treadmill  
387 performance test as measured by the distance traveled in 6 minutes. (two experiments,  $n = 10$ ;  
388 two-way ANOVA: \*\*\*\*  $P < 0.0001$ , symbols represent the mean  $\pm$  SEM). **n-w.** Respiratory  
389 mechanics parameters from the lung function assessment in mock-treated or SARS-CoV-2  
390 infected male and female mice at 2, 4, and 7 dpi. Individual results with group mean are shown.  
391 **n.** Inspiratory capacity. **o.** Respiratory system resistance. **p.** Respiratory system elastance. **q.**  
392 Pressure-Volume (PV) loops. **r.** Static compliance. **s.** Shape parameter K. **t.** Hysteresis (Area).  
393 **u.** Newtonian resistance. **v.** Tissue damping. **w.** Tissue elastance (two experiments,  $n = 6-7$  per  
394 group; one-way ANOVA with Dunnett's test; \*  $P < 0.05$ ; \*\*\*  $P < 0.001$ ; \*\*\*\*  $P < 0.0001$ , bars  
395 represent the mean and the dotted line indicates the mean value of the mock-treated group).

396 **Figure 4. The immune response to SARS-CoV-2 Infection in the lungs of K18-hACE2**  
397 **mice. a-b.** Flow cytometric analysis of lung tissues (**a**) and bronchoalveolar lavage (**b**) at 2, 4,  
398 and 7 dpi post-SARS-CoV-2 infection (two experiments,  $n = 4-6$  per group; one-way ANOVA; \*  $P$   
399  $< 0.05$ ; \*\*  $P < 0.01$ ; \*\*\*  $P < 0.001$ , bars represent the mean and the dotted line indicates the mean  
400 value of the mock-treated group). Asterisks indicate statistical significance compared to mock  
401 infection. **c.** Fold change in gene expression of indicated cytokines and chemokines as  
402 determined by RT-qPCR, normalized to *Gapdh*, and compared to naïve controls in lung  
403 homogenates at 2, 4 and 7 dpi (two experiments,  $n = 9-11$  per group). Dotted line indicates the  
404 average level of cytokine or chemokine transcript in naïve mice. **d.** Heat-maps of cytokine levels  
405 as measured by multiplex platform in lung tissue of SARS-CoV-2-infected mice at 2, 4, and 7 dpi.  
406 For each cytokine, fold-change was calculated compared to mock-infected animals and  $\text{Log}_2(\text{fold-}$   
407  $\text{change})$  was plotted in the corresponding heat-map (two experiments,  $n = 9-11$  per group,  
408 associated statistics are reported in **Extended Data Fig 5**).

409 **Figure 5. Distinct transcriptional signatures are associated with early and late**  
410 **immune responses to SARS-CoV-2 infection.** RNA sequencing analysis from the lung  
411 homogenates of naïve K18-hACE2 mice and at 2, 4, and 7 dpi (two experiments,  $n = 4-6$  group)

412 a. Principal component analysis performed for 20 samples with the  $\log_2$ -transformed gene-level  
413 counts per million (log2cpm) data b. Volcano plots comparing differentially-expressed genes from  
414 samples taken at day 2 versus day 0, day 4 versus day 0, and day 7 versus day 0. Red and blue  
415 indicate upregulated (red) and downregulated (blue) genes that demonstrated a fold-change  $> 2$   
416 and false discovery rate (q-value)  $< 0.05$ . The dashed horizontal lines mark a q-value of 0.05 and  
417 vertical lines indicate  $\log_2$  fold-change of 1. Each dot in the volcano plots represents a single  
418 gene. c. Venn diagram of overlapping genes identified in differential expression analysis when  
419 comparing mock to 2, 4, and 7 dpi. Numbers in the parenthesis under each comparison indicates  
420 the total number of significantly differential genes followed by the proportion of the total that are  
421 up and down-regulated. d. GO Enrichment Analysis of biological process terms enriched in up-  
422 regulated genes from comparisons of mice 2, 4, and 7 days dpi against mock-infected mice.  
423 Terms were ranked by the false discovery rate (q-value), and the top 20 are listed after eliminating  
424 redundant terms. e-g. Heat maps of significantly up-regulated genes during SARS-CoV-2  
425 infection enriched in cytokine-mediated signaling pathway (e), type I IFN signaling pathway (f),  
426 and cellular response to  $\text{IFN}\gamma$  (g) identified through Gene Ontology analysis. Genes shown in  
427 each pathway are the union of the differentially expressed genes from the three comparisons (2,  
428 4, and 7 dpi versus mock-infected). Columns represent samples and rows represent genes. Gene  
429 expression levels in the heat maps are z score-normalized values determined from log2cpm  
430 values.

431

## 432 EXTENDED DATA FIGURE LEGENDS

433 **Extended Data Figure 1. hACE2 expression in the K18-hACE2 model.** a. mRNA  
434 expression levels of hACE2 in the lung, kidney, heart, brain, spleen, duodenum, colon, and ileum  
435 of naive K18 hACE2 mice (two experiments,  $n = 5$ ). b. mRNA expression levels of hACE2 in the  
436 lungs of K18 hACE2 mice at 2, 4, and 7 dpi following SARS-CoV-2 infection (two experiments,  $n$   
437 = 4 per time point, bars represent the mean value of each group).

438 **Extended Data Figure 2. SARS-CoV-2 Infection in the brain.** SARS-CoV-2 RNA *in situ*  
439 hybridization of brain sections from K18-hACE2 mice following intranasal infection with  $2.5 \times 10^4$   
440 PFU of SARS-CoV-2 at 7 dpi. Images show low-power magnification (scale bars, 100  $\mu\text{m}$ ) with a  
441 high-power inset. One of six infected mice stained positively for viral RNA in the brain. Images  
442 are from this mouse and another that showed virtually no infection in the brain.

443 **Extended Data Figure 3. Extra-pulmonary histopathology after SARS-CoV-2**  
444 **infection. a-d.** Hematoxylin and eosin staining of the brain (a), heart (b), liver (c), kidney (d), and  
445 spleen (e) from K18-hACE2 mice following mock infection or at 7 dpi. Scale bars indicate 200  $\mu\text{m}$ .  
446 For a, microscopic images show inflamed vessels with extravasation of immune cells into the  
447 brain parenchyma, microglial activation, and subarachnoid inflammation with involvement of the  
448 underlying parenchyma. The dashed box indicates the location of two higher power magnification  
449 images below.

450 **Extended Data Figure 4. Flow cytometric analysis.** Flow cytometric gating strategy for  
451 BAL and lung tissue analysis.

452 **Extended Data Figure 5. Cytokine induction following SARS-CoV-2 Infection.**  
453 Cytokine levels as measured by multiplex platform in lung tissue of SARS-CoV-2-infected mice  
454 at 2, 4, and 7 dpi (two experiments,  $n = 9-11$  per group; one-way ANOVA with Dunnett's test; \*  $P$   
455  $< 0.05$ ; \*\*  $P < 0.01$ ; \*\*\*  $P < 0.001$ , bars represent the mean value of each group).

456 **Extended Data Figure 6. Transcriptional immune signatures following SARS-CoV-2**  
457 **infection. a-c.** Heat maps of significantly upregulated genes during SARS-CoV-2 infection  
458 enriched in neutrophil activation pathways (a), Toll-like receptor signaling pathway (b), and  
459 negative regulation of viral genome replication (c) identified through Gene Ontology analysis.  
460 Genes shown in each pathway are the union of differentially expressed genes from the three  
461 comparisons (2, 4, and 7 dpi versus mock-infected). Columns represent samples and rows  
462 represent genes. Gene expression levels in the heat maps are z score-normalized values  
463 determined from  $\log_2$  [cpm values].



464            **Supplementary Table 1.** Lists of up-regulated genes enriched in cytokine-mediated  
465 signaling pathway, type I IFN signaling pathway, cellular response to IFN $\gamma$ , neutrophil activation  
466 pathways, toll-like receptor signaling pathways, and negative regulation of viral genome  
467 replication identified through Gene Ontology analysis and their associated q-value and fold-  
468 change values.

469 **METHODS**

470 **Cells and viruses.** Vero E6 (CRL-1586, American Type Culture Collection (ATCC), Vero  
471 CCL81 (ATCC), and Vero-furin cells<sup>42</sup> were cultured at 37°C in Dulbecco's Modified Eagle  
472 medium (DMEM) supplemented with 10% fetal bovine serum (FBS), 10 mM HEPES pH 7.3, 1 mM  
473 sodium pyruvate, 1× non-essential amino acids, and 100 U/ml of penicillin–streptomycin. The  
474 2019n-CoV/USA\_WA1/2019 isolate of SARS-CoV-2 was obtained from the US Centers for  
475 Disease Control (CDC). Infectious stocks were grown by inoculating Vero CCL81 cells and  
476 collecting supernatant upon observation of cytopathic effect; debris was removed by  
477 centrifugation and passage through a 0.22 µm filter. Supernatant was then aliquoted and stored  
478 at -80°C.

479 **Biosafety.** All aspects of this study were approved by the office of Environmental Health  
480 and Safety at Washington University School of Medicine prior to the initiation of this study. Work  
481 with SARS-CoV-2 was performed in a BSL-3 laboratory by personnel equipped with powered air  
482 purifying respirators.

483 **Mice.** Animal studies were carried out in accordance with the recommendations in the  
484 Guide for the Care and Use of Laboratory Animals of the National Institutes of Health. The  
485 protocols were approved by the Institutional Animal Care and Use Committee at the Washington  
486 University School of Medicine (assurance number A3381–01). Virus inoculations were performed  
487 under anesthesia that was induced and maintained with ketamine hydrochloride and xylazine,  
488 and all efforts were made to minimize animal suffering.

489 Heterozygous K18-hACE c57BL/6J mice (strain: 2B6.Cg-Tg(K18-ACE2)2PrImn/J) were  
490 obtained from The Jackson Laboratory. Animals were housed in groups and fed standard chow  
491 diets. Mice of different ages and both sexes were administered  $2.5 \times 10^4$  PFU of SARS-CoV-2 via  
492 intranasal administration.

493 **Plaque forming assay.** Vero-furin cells<sup>42</sup> were seeded at a density of  $2.5 \times 10^5$  cells per  
494 well in flat-bottom 12-well tissue culture plates. The following day, media was removed and

495 replaced with 200  $\mu$ L of 10-fold serial dilutions of the material to be titered, diluted in DMEM+2%  
496 FBS. One hours later, 1 mL of methylcellulose overlay was added. Plates were incubated for 72  
497 hours, then fixed with 4% paraformaldehyde (final concentration) in phosphate-buffered saline for  
498 20 minutes. Plates were stained with 0.05% (w/v) crystal violet in 20% methanol and washed  
499 twice with distilled, deionized H<sub>2</sub>O.

500 **Measurement of viral burden and *hACE2* expression.** Tissues were weighed and  
501 homogenized with zirconia beads in a MagNA Lyser instrument (Roche Life Science) in 1000  $\mu$ L  
502 of DMEM media supplemented with 2% heat-inactivated FBS. Tissue homogenates were clarified  
503 by centrifugation at 10,000 rpm for 5 min and stored at  $-80^{\circ}\text{C}$ . RNA was extracted using the  
504 MagMax mirVana Total RNA isolation kit (Thermo Scientific) on the Kingfisher Flex extraction  
505 robot (Thermo Scientific). RNA was reverse transcribed and amplified using the TaqMan RNA-to-  
506 CT 1-Step Kit (ThermoFisher). Reverse transcription was carried out at  $48^{\circ}\text{C}$  for 15 min followed  
507 by 2 min at  $95^{\circ}\text{C}$ . Amplification was accomplished over 50 cycles as follows:  $95^{\circ}\text{C}$  for 15 s and  
508  $60^{\circ}\text{C}$  for 1 min. Copies of SARS-CoV-2 N gene RNA in samples were determined using a  
509 previously published assay<sup>8</sup>. Briefly, a TaqMan assay was designed to target a highly conserved  
510 region of the N gene (Forward primer: ATGCTGCAATCGTGCTACAA; Reverse primer:  
511 GACTGCCGCCTCTGCTC; Probe: /56-FAM/TCAAGGAAC/ZEN/AACATTGCCAA/3IABkFQ/).  
512 This region was included in an RNA standard to allow for copy number determination down to 10  
513 copies per reaction. The reaction mixture contained final concentrations of primers and probe of  
514 500 and 100 nM, respectively.

515 For *hACE2* expression, RNA was DNase-treated (Thermo Scientific) following the  
516 manufacturer's protocol. RNA levels were quantified as described above with the primer/probe  
517 set for *hACE2* (IDT assay: Hs.PT.58.27645939), compared to an RNA standard curve, and  
518 normalized to mg of tissue.

519 **Cytokine and chemokine mRNA measurements.** RNA was isolated from lung  
520 homogenates as described above. cDNA was synthesized from DNase-treated RNA using the

521 High-Capacity cDNA Reverse Transcription kit (Thermo Scientific) with the addition of RNase  
522 inhibitor following the manufacturer's protocol. Cytokine and chemokine expression was  
523 determined using TaqMan Fast Universal PCR master mix (Thermo Scientific) with commercial  
524 primers/probe sets specific for *IFN-g* (IDT: Mm.PT.58.41769240), *IL-6* (Mm.PT.58.10005566), *IL-*  
525 *1b* (Mm.PT.58.41616450), *TNF-a* (Mm.PT.58.12575861), *CXCL10* (Mm.PT.58.43575827), *CCL2*  
526 (Mm.PT.58.42151692), *CCL5* (Mm.PT.58.43548565), *CXCL11* (Mm.PT.58.10773148.g), *IFN-b*  
527 (Mm.PT.58.30132453.g), and *IL-28a/b* (Thermo Scientific Mm04204156\_gH) and results were  
528 normalized to *GAPDH* (Mm.PT.39a.1) levels. Fold change was determined using the  $2^{-\Delta\Delta Ct}$   
529 method comparing treated mice to naïve controls.

530 **Cytokine and chemokine protein measurements.** Lung homogenates were incubated  
531 with Triton-X-100 (1% final concentration) for 1 h at room temperature to inactivate SARS-CoV-  
532 2. Homogenates then were analyzed for cytokines and chemokines by Eve Technologies  
533 Corporation (Calgary, AB, Canada) using their Mouse Cytokine Array / Chemokine Array 44-Plex  
534 (MD44) platform.

535 **Histology and RNA *in situ* hybridization.** Animals were euthanized before harvest and  
536 fixation of tissues. The left lung was first tied off at the left main bronchus and collected for viral  
537 RNA analysis. The right lung then was inflated with ~1.2 mL of 10% neutral buffered formalin  
538 using a 3-mL syringe and catheter inserted into the trachea. For harvesting of brains for fixation,  
539 the mouse was decapitated, and the skull cap removed. The whole brain was removed intact, cut  
540 mid-sagittally to increase surface area of fixation, and drop fixed in 10% neutral-buffered formalin  
541 (NBF). For kidney, spleen, liver, and heart, organs were removed and drop-fixed in 10% NBF. For  
542 fixation after infection, organs were kept in a 40-mL suspension of NBF for 7 days before further  
543 processing. Tissues were embedded in paraffin, and sections were stained with hematoxylin and  
544 eosin. RNA *in situ* hybridization was performed using the RNAscope 2.5 HD Assay (Brown Kit)  
545 according to the manufacturer's instructions (Advanced Cell Diagnostics). Briefly, sections were  
546 deparaffinized, treated with H<sub>2</sub>O<sub>2</sub> and Protease Plus prior to probe hybridization. Probes

547 specifically targeting hACE2 (cat no. 848151) or SARS-CoV-2 S sequence (cat no 848561) were  
548 hybridized followed by proprietary signal amplification and detection with 3,3'-Diaminobenzidine.  
549 Tissues were counterstained with Gill's hematoxylin. An uninfected mouse was used as a  
550 negative control and stained in parallel. Tissue sections were visualized using a Nikon Eclipse  
551 microscope equipped with an Olympus DP71 camera, a Leica DM6B microscope equipped with  
552 a Leica DFC7000T camera, or an Olympus BX51 microscope with attached camera.

553 **Flow cytometry analysis of immune cell infiltrates.** For analysis of BAL fluid, mice  
554 were sacrificed by ketamine overdose, followed by cannulation of the trachea with a 19-G canula.  
555 BAL was performed with three washes of 0.8 ml of sterile PBS. BAL fluid was centrifuged, and  
556 single cell suspensions were generated for staining. For analysis of lung tissue, mice were  
557 perfused with sterile PBS and the right inferior lung lobes were digested at 37°C with 630 µg/ml  
558 collagenase D (Roche) and 75 U/ml DNase I (Sigma) for 2 hours. Single cell suspensions of BAL  
559 and lung digests were preincubated with Fc Block antibody (BD PharMingen) in PBS + 2% heat-  
560 inactivated FBS for 10 min at room temperature before staining. Cells were incubated with  
561 antibodies against the following markers: AF700 anti-CD45 (clone 30 F-11), APC-Cy7 anti-CD11c  
562 (clone N418), PE anti-Siglec F (clone E50-2440; BD), PE-Cy7 anti-Ly6G (clone 1A8), BV605 anti-  
563 Ly6C (clone HK1.4; Biolegend), BV 711 anti-CD11b (clone M1/70), APC anti-CD103 (clone 2E7;  
564 eBioscience), PB anti-CD3 (clone 17A2), PE-Cy7, APC anti-CD4 (clone RM4-5), PE-Cy7 anti-  
565 CD8 (clone53-6.7), anti-NK1.1 (clone PK136), and BV605 anti-TCR  $\gamma/\delta$  (clone GL3). All  
566 antibodies were used at a dilution of 1:200. Cells were stained for 20 min at 4°C, washed, fixed  
567 and permeabilized for intracellular staining with Foxp3/Transcription Factor Staining Buffer Set  
568 (eBioscience) according to manufacturer's instructions. Cells were incubated overnight at 4°C  
569 with PE-Cy5 anti-Foxp3 (clone FJK-16s), washed, re-fixed with 4% PFA (EMS) for 20 min and  
570 resuspended in permeabilization buffer. Absolute cell counts were determined using TruCount  
571 beads (BD). Flow cytometry data were acquired on a cytometer (BD-X20; BD Biosciences) and  
572 analyzed using FlowJo software (Tree Star).

573           **Clinical laboratory analysis.** Testing was performed on fresh whole-blood samples  
574 within a biosafety cabinet using point-of-care instruments. Prothrombin time was measured using  
575 the Coagucheck (Roche) meter. Electrolyte, acid-base, and hematology parameters were  
576 assayed on lithium-heparinized whole blood using the iSTAT-1 (Abbot) with the Chem8+  
577 cartridge.

578           **Respiratory mechanics.** Mice were anesthetized with ketamine/xylazine (100 mg/kg and  
579 10 mg/kg, i.p., respectively). The trachea was isolated via dissection of the neck area and  
580 cannulated using an 18-gauge blunt metal cannula (typical resistance of 0.18 cmH<sub>2</sub>O.s/mL), which  
581 was secured in place with a nylon suture. The mouse then was connected to the flexiVent  
582 computer-controlled piston ventilator (SCIREQ Inc.) via the cannula, which was attached to the  
583 FX adaptor Y-tubing. Mechanical ventilation was initiated, and mice were given an additional 100  
584 mg/kg of ketamine and 0.1 mg/mouse of the paralytic pancuronium bromide via intraperitoneal  
585 route to prevent breathing efforts against the ventilator and during measurements. Mice were  
586 ventilated using default settings for mice, which consisted in a positive end expiratory pressure at  
587 3 cm H<sub>2</sub>O, a 10 mL/kg tidal volume (V<sub>t</sub>), a respiratory rate at 150 breaths per minute (bpm), and  
588 an fraction of inspired oxygen (FiO<sub>2</sub>) of 0.21 (*i.e.*, room air). Respiratory mechanics were assessed  
589 using the forced oscillation technique, as previously described<sup>43</sup>, using the latest version of the  
590 flexiVent operating software (flexiWare v8.1.3). Pressure-volume loops and measurements of  
591 inspiratory capacity were also done.

592           **Treadmill stress test.** A six-lane mouse treadmill (Columbus Instruments, Columbus OH)  
593 was placed within a biosafety cabinet within the ABSL-3 laboratory. Mice were introduced to the  
594 treadmill test three times prior to infection, with each introductory session performed at  
595 increasingly faster rates. In general, the treadmill was set to ramp from 0 to maximum speed over  
596 the course of the first minute, then maintain maximum speed for 5 min. Failure to maintain  
597 adequate speed resulted in delivery of a shock; this occurred until the animal reingaged the

598 treadmill for a maximum of 5 failures. For each sex, we identified a speed at which >80% of mice  
599 successfully completed the test prior to infection (16 m/s for female; 14 m/s for male).

600 **RNA sequencing.** cDNA libraries were constructed starting with 10 ng of total RNA from  
601 lung tissues of each sample that was extracted using a MagMax mirVana Total RNA isolation kit  
602 (Thermo Scientific). cDNA was generated using the Seqplex kit (Sigma-Aldrich) with amplification  
603 of 20 cycles. Library construction was performed using 100 ng of cDNA undergoing end repair, A  
604 tailing, ligation of universal TruSeq adapters and amplification of 8 cycles to incorporate unique  
605 dual index sequences. Libraries were sequenced on the NovaSeq 6000 (Illumina, San Diego, CA)  
606 targeting 40 million read pairs and extending 150 cycles with paired end reads. RNA-seq reads  
607 were aligned to the mouse Ensembl GRCh38.76 primary assembly and SARS-CoV-2 NCBI  
608 NC\_045512 Wuhan-Hu-1 genome with STAR program (version 2.5.1a)<sup>44</sup>. Gene counts were  
609 derived from the number of uniquely aligned unambiguous reads by Subread:featureCount  
610 (version 1.4.6-p5)<sup>45</sup>. The ribosomal fraction, known junction saturation, and read distribution over  
611 known gene models were quantified with RSeQC (version 2.6.2)<sup>46</sup>. All gene counts were  
612 preprocessed with the R package EdgeR<sup>47</sup> to adjust samples for differences in library size using  
613 the trimmed mean of M values (TMM) normalization procedure. Ribosomal genes and genes not  
614 expressed at a level greater than or equal to 1 count per million reads in the smallest group size  
615 were excluded from further analysis. The R package limma<sup>48</sup> with voomWithQualityWeights  
616 function<sup>49</sup> was utilized to calculate the weighted likelihoods for all samples, based on the observed  
617 mean-variance relationship of every gene and sample. Differentially expressed genes were  
618 defined as those with at least 2-fold difference between two individual groups at the Benjamini-  
619 Hochberg false-discovery rate (FDR) adjusted p-value, i.e. q-value < 0.05.

620 **Statistical analysis** Statistical significance was assigned when *P* values were < 0.05  
621 using Prism Version 8 (GraphPad) and specific tests are indicated in the Figure legends. Analysis  
622 of weight change was determined by two-way ANOVA. Changes in functional parameters or

623 immune parameters were compared to mock-infected animals and were analyzed by one-way  
624 ANOVA or one-way ANOVA with Dunnett's test.

625 **Data availability.** All data supporting the findings of this study are found within the paper  
626 and its Extended Data Figures, and are available from the corresponding author upon request.  
627 RNA sequencing data sets generated in this study are available at GEO: GSE154104.

628



629     **REFERENCES**

- 630     1     Ziegler, C. G. K. *et al.* SARS-CoV-2 Receptor ACE2 Is an Interferon-Stimulated Gene in  
631     Human Airway Epithelial Cells and Is Detected in Specific Cell Subsets across Tissues.  
632     *Cell* **181**, 1016-1035.e1019, doi:10.1016/j.cell.2020.04.035 (2020).  
633
- 634     2     Hamming, I. *et al.* Tissue distribution of ACE2 protein, the functional receptor for SARS  
635     coronavirus. A first step in understanding SARS pathogenesis. *J Pathol* **203**, 631-637,  
636     doi:10.1002/path.1570 (2004).  
637
- 638     3     Lai, C. C., Ko, W. C., Lee, P. I., Jean, S. S. & Hsueh, P. R. Extra-respiratory manifestations  
639     of COVID-19. *International journal of antimicrobial agents*, 106024,  
640     doi:10.1016/j.ijantimicag.2020.106024 (2020).  
641
- 642     4     Rockx, B. *et al.* Comparative pathogenesis of COVID-19, MERS, and SARS in a  
643     nonhuman primate model. *Science* **368**, 1012-1015, doi:10.1126/science.abb7314  
644     (2020).  
645
- 646     5     Cleary, S. J. *et al.* Animal models of mechanisms of SARS-CoV-2 infection and COVID-  
647     19 pathology. *Br J Pharmacol*, doi:10.1111/bph.15143 (2020).  
648
- 649     6     Letko, M., Marzi, A. & Munster, V. Functional assessment of cell entry and receptor usage  
650     for SARS-CoV-2 and other lineage B betacoronaviruses. *Nature microbiology* **5**, 562-569,  
651     doi:10.1038/s41564-020-0688-y (2020).  
652
- 653     7     Wan, Y., Shang, J., Graham, R., Baric, R. S. & Li, F. Receptor recognition by novel  
654     coronavirus from Wuhan: An analysis based on decade-long structural studies of SARS.  
655     *J Virol*, doi:10.1128/jvi.00127-20 (2020).  
656
- 657     8     Hassan, A. O. *et al.* A SARS-CoV-2 Infection Model in Mice Demonstrates Protection by  
658     Neutralizing Antibodies. *Cell*, doi:10.1016/j.cell.2020.06.011 (2020).  
659
- 660     9     McCray, P. B., Jr. *et al.* Lethal infection of K18-hACE2 mice infected with severe acute  
661     respiratory syndrome coronavirus. *J Virol* **81**, 813-821, doi:10.1128/jvi.02012-06 (2007).  
662
- 663     10     Jiang, R. D. *et al.* Pathogenesis of SARS-CoV-2 in Transgenic Mice Expressing Human  
664     Angiotensin-Converting Enzyme 2. *Cell*, doi:10.1016/j.cell.2020.05.027 (2020).  
665
- 666     11     Bao, L. *et al.* The pathogenicity of SARS-CoV-2 in hACE2 transgenic mice. *Nature*,  
667     doi:10.1038/s41586-020-2312-y (2020).  
668
- 669     12     Sun, S. H. *et al.* A Mouse Model of SARS-CoV-2 Infection and Pathogenesis. *Cell Host*  
670     *Microbe*, doi:10.1016/j.chom.2020.05.020 (2020).  
671
- 672     13     Yang, X., Pabon, L. & Murry, C. E. Engineering adolescence: maturation of human  
673     pluripotent stem cell-derived cardiomyocytes. *Circulation research* **114**, 511-523,  
674     doi:10.1161/circresaha.114.300558 (2014).  
675
- 676     14     Netland, J., Meyerholz, D. K., Moore, S., Cassell, M. & Perlman, S. Severe acute  
677     respiratory syndrome coronavirus infection causes neuronal death in the absence of

- 678 encephalitis in mice transgenic for human ACE2. *J Virol* **82**, 7264-7275,  
679 doi:10.1128/jvi.00737-08 (2008).  
680
- 681 15 Robichaud, A., Fereydoonzad, L., Urovitch, I. B. & Brunet, J. D. Comparative study of  
682 three flexiVent system configurations using mechanical test loads. *Experimental lung*  
683 *research* **41**, 84-92, doi:10.3109/01902148.2014.971921 (2015).  
684
- 685 16 Barbeta, E. *et al.* SARS-CoV-2-induced Acute Respiratory Distress Syndrome: Pulmonary  
686 Mechanics and Gas Exchange Abnormalities. *Annals of the American Thoracic Society*,  
687 doi:10.1513/AnnalsATS.202005-462RL (2020).  
688
- 689 17 Giamarellos-Bourboulis, E. J. *et al.* Complex Immune Dysregulation in COVID-19 Patients  
690 with Severe Respiratory Failure. *Cell Host Microbe*, doi:10.1016/j.chom.2020.04.009  
691 (2020).  
692
- 693 18 Liao, M. *et al.* Single-cell landscape of bronchoalveolar immune cells in patients with  
694 COVID-19. *Nat Med* **26**, 842-844, doi:10.1038/s41591-020-0901-9 (2020).  
695
- 696 19 Bost, P. *et al.* Host-Viral Infection Maps Reveal Signatures of Severe COVID-19 Patients.  
697 *Cell* **181**, 1475-1488.e1412, doi:10.1016/j.cell.2020.05.006 (2020).  
698
- 699 20 Mehta, P. *et al.* COVID-19: consider cytokine storm syndromes and immunosuppression.  
700 *Lancet* **395**, 1033-1034, doi:10.1016/s0140-6736(20)30628-0 (2020).  
701
- 702 21 Huang, C. *et al.* Clinical features of patients infected with 2019 novel coronavirus in  
703 Wuhan, China. *Lancet* **395**, 497-506, doi:10.1016/s0140-6736(20)30183-5 (2020).  
704
- 705 22 Chua, R. L. *et al.* COVID-19 severity correlates with airway epithelium-immune cell  
706 interactions identified by single-cell analysis. *Nat Biotechnol*, doi:10.1038/s41587-020-  
707 0602-4 (2020).  
708
- 709 23 Chen, X. *et al.* Detectable serum SARS-CoV-2 viral load (RNAemia) is closely correlated  
710 with drastically elevated interleukin 6 (IL-6) level in critically ill COVID-19 patients. *Clin*  
711 *Infect Dis*, doi:10.1093/cid/ciaa449 (2020).  
712
- 713 24 Liu, J. *et al.* Longitudinal characteristics of lymphocyte responses and cytokine profiles in  
714 the peripheral blood of SARS-CoV-2 infected patients. *EBioMedicine* **55**, 102763,  
715 doi:10.1016/j.ebiom.2020.102763 (2020).  
716
- 717 25 Yang, Y. *et al.* Plasma IP-10 and MCP-3 levels are highly associated with disease severity  
718 and predict the progression of COVID-19. *J Allergy Clin Immunol* **146**, 119-127.e114,  
719 doi:10.1016/j.jaci.2020.04.027 (2020).  
720
- 721 26 Zhou, Z. *et al.* Heightened Innate Immune Responses in the Respiratory Tract of COVID-  
722 19 Patients. *Cell Host Microbe* **27**, 883-890.e882, doi:10.1016/j.chom.2020.04.017  
723 (2020).  
724
- 725 27 Blanco-Melo, D. *et al.* Imbalanced Host Response to SARS-CoV-2 Drives Development  
726 of COVID-19. *Cell* **181**, 1036-1045.e1039, doi:10.1016/j.cell.2020.04.026 (2020).

- 727 28 Cook, L. E. *et al.* Distinct Roles of Interferon Alpha and Beta in Controlling Chikungunya  
728 Virus Replication and Modulating Neutrophil-Mediated Inflammation. *J Virol* **94**, e00841-  
729 00819, doi:10.1128/jvi.00841-19 (2019).  
730
- 731 29 Ng, C. T., Mendoza, J. L., Garcia, K. C. & Oldstone, M. B. Alpha and Beta Type 1 Interferon  
732 Signaling: Passage for Diverse Biologic Outcomes. *Cell* **164**, 349-352,  
733 doi:10.1016/j.cell.2015.12.027 (2016).  
734
- 735 30 Ng, C. T. *et al.* Blockade of interferon Beta, but not interferon alpha, signaling controls  
736 persistent viral infection. *Cell Host Microbe* **17**, 653-661, doi:10.1016/j.chom.2015.04.005  
737 (2015).  
738
- 739 31 Park, A. & Iwasaki, A. Type I and Type III Interferons - Induction, Signaling, Evasion, and  
740 Application to Combat COVID-19. *Cell Host Microbe* **27**, 870-878,  
741 doi:10.1016/j.chom.2020.05.008 (2020).  
742
- 743 32 Lazear, H. M., Schoggins, J. W. & Diamond, M. S. Shared and Distinct Functions of Type  
744 I and Type III Interferons. *Immunity* **50**, 907-923, doi:10.1016/j.immuni.2019.03.025  
745 (2019).  
746
- 747 33 Jiang, D. *et al.* Identification of three interferon-inducible cellular enzymes that inhibit the  
748 replication of hepatitis C virus. *J Virol* **82**, 1665-1678 (2008).  
749
- 750 34 Pan, F. *et al.* Time Course of Lung Changes at Chest CT during Recovery from  
751 Coronavirus Disease 2019 (COVID-19). *Radiology* **295**, 715-721,  
752 doi:10.1148/radiol.2020200370 (2020).  
753
- 754 35 Xu, Z. *et al.* Pathological findings of COVID-19 associated with acute respiratory distress  
755 syndrome. *The Lancet. Respiratory medicine* **8**, 420-422, doi:10.1016/s2213-  
756 2600(20)30076-x (2020).  
757
- 758 36 Chen, G. *et al.* Clinical and immunological features of severe and moderate coronavirus  
759 disease 2019. *J Clin Invest* **130**, 2620-2629, doi:10.1172/jci137244 (2020).  
760
- 761 37 Channappanavar, R. *et al.* Dysregulated Type I Interferon and Inflammatory Monocyte-  
762 Macrophage Responses Cause Lethal Pneumonia in SARS-CoV-Infected Mice. *Cell Host*  
763 *Microbe* **19**, 181-193, doi:10.1016/j.chom.2016.01.007 (2016).  
764
- 765 38 Mostafavi, S. *et al.* Parsing the Interferon Transcriptional Network and Its Disease  
766 Associations. *Cell* **164**, 564-578, doi:10.1016/j.cell.2015.12.032 (2016).  
767
- 768 39 Barnett, E. M., Cassell, M. D. & Perlman, S. Two neurotropic viruses, herpes simplex virus  
769 type 1 and mouse hepatitis virus, spread along different neural pathways from the main  
770 olfactory bulb. *Neuroscience* **57**, 1007-1025, doi:10.1016/0306-4522(93)90045-h (1993).  
771
- 772 40 Spinato, G. *et al.* Alterations in Smell or Taste in Mildly Symptomatic Outpatients With  
773 SARS-CoV-2 Infection. *Jama* **323**, 2089-2090, doi:10.1001/jama.2020.6771 (2020).  
774
- 775 41 Li, Y., Zhou, W., Yang, L. & You, R. Physiological and pathological regulation of ACE2,  
776 the SARS-CoV-2 receptor. *Pharmacological research* **157**, 104833,  
777 doi:10.1016/j.phrs.2020.104833 (2020).

- 778  
779 42 Mukherjee, S. *et al.* Enhancing dengue virus maturation using a stable furin over-  
780 expressing cell line. *Virology* **497**, 33-40, doi:10.1016/j.virol.2016.06.022 (2016).  
781  
782 43 McGovern, T. K., Robichaud, A., Fereydoonzad, L., Schuessler, T. F. & Martin, J. G.  
783 Evaluation of respiratory system mechanics in mice using the forced oscillation technique.  
784 *J Vis Exp*, e50172, doi:10.3791/50172 (2013).  
785  
786 44 Dobin, A. *et al.* STAR: ultrafast universal RNA-seq aligner. *Bioinformatics* **29**, 15-21,  
787 doi:10.1093/bioinformatics/bts635 (2013).  
788  
789 45 Liao, Y., Smyth, G. K. & Shi, W. featureCounts: an efficient general purpose program for  
790 assigning sequence reads to genomic features. *Bioinformatics* **30**, 923-930,  
791 doi:10.1093/bioinformatics/btt656 (2014).  
792  
793 46 Wang, L., Wang, S. & Li, W. RSeQC: quality control of RNA-seq experiments.  
794 *Bioinformatics* **28**, 2184-2185, doi:10.1093/bioinformatics/bts356 (2012).  
795  
796 47 Robinson, M. D., McCarthy, D. J. & Smyth, G. K. edgeR: a Bioconductor package for  
797 differential expression analysis of digital gene expression data. *Bioinformatics* **26**, 139-  
798 140, doi:10.1093/bioinformatics/btp616 (2010).  
799  
800 48 Ritchie, M. E. *et al.* limma powers differential expression analyses for RNA-sequencing  
801 and microarray studies. *Nucleic Acids Res* **43**, e47, doi:10.1093/nar/gkv007 (2015).  
802  
803 49 Liu, R. *et al.* Why weight? Modelling sample and observational level variability improves  
804 power in RNA-seq analyses. *Nucleic Acids Res* **43**, e97, doi:10.1093/nar/gkv412 (2015).  
805

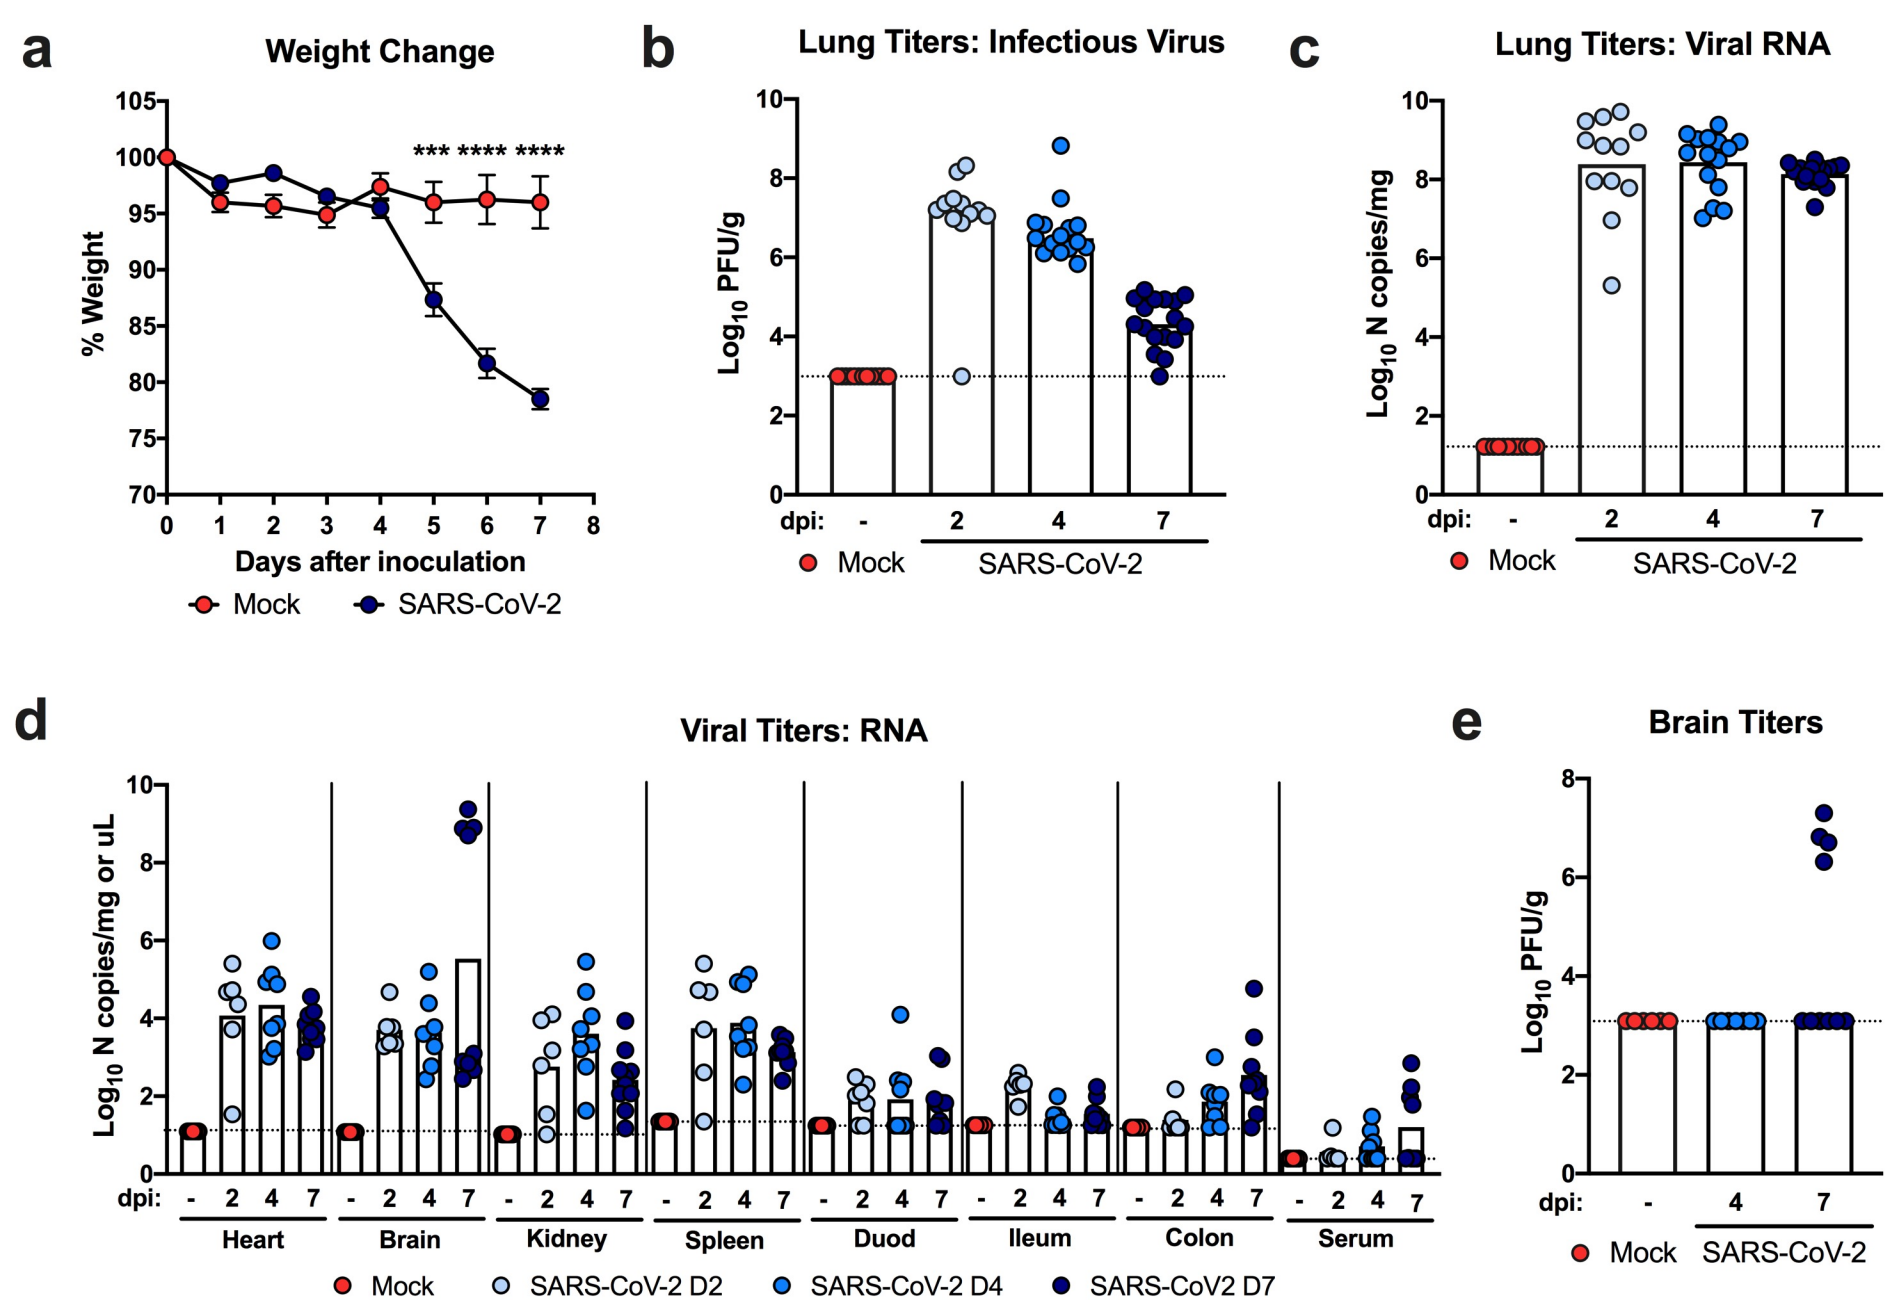

**Figure 1**



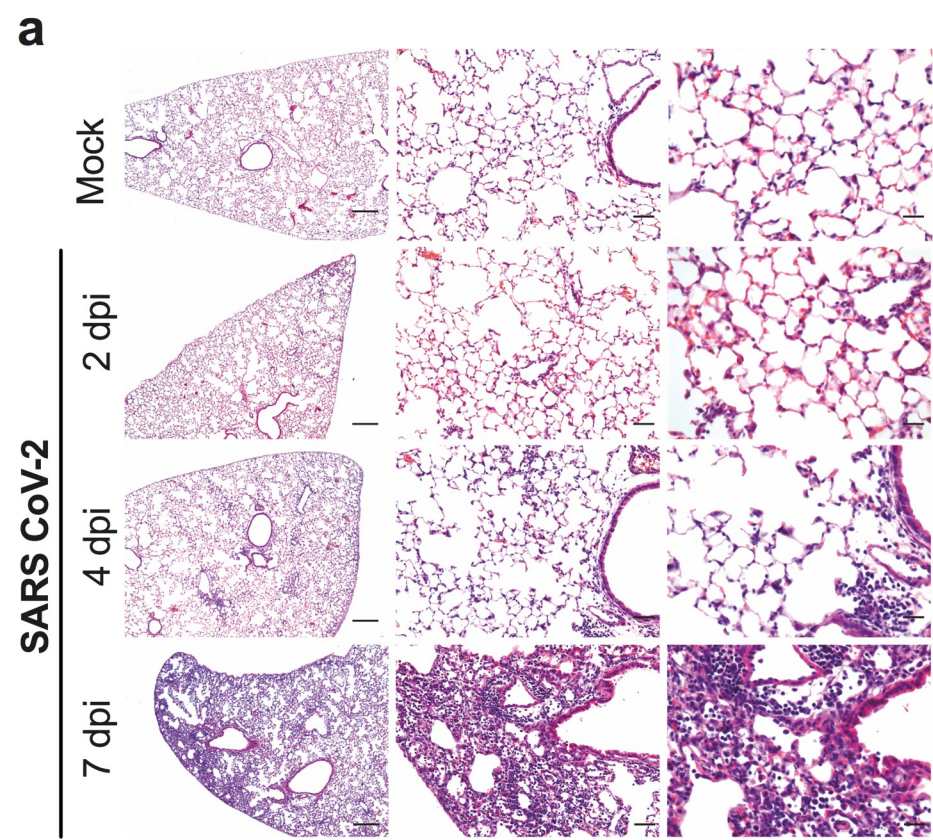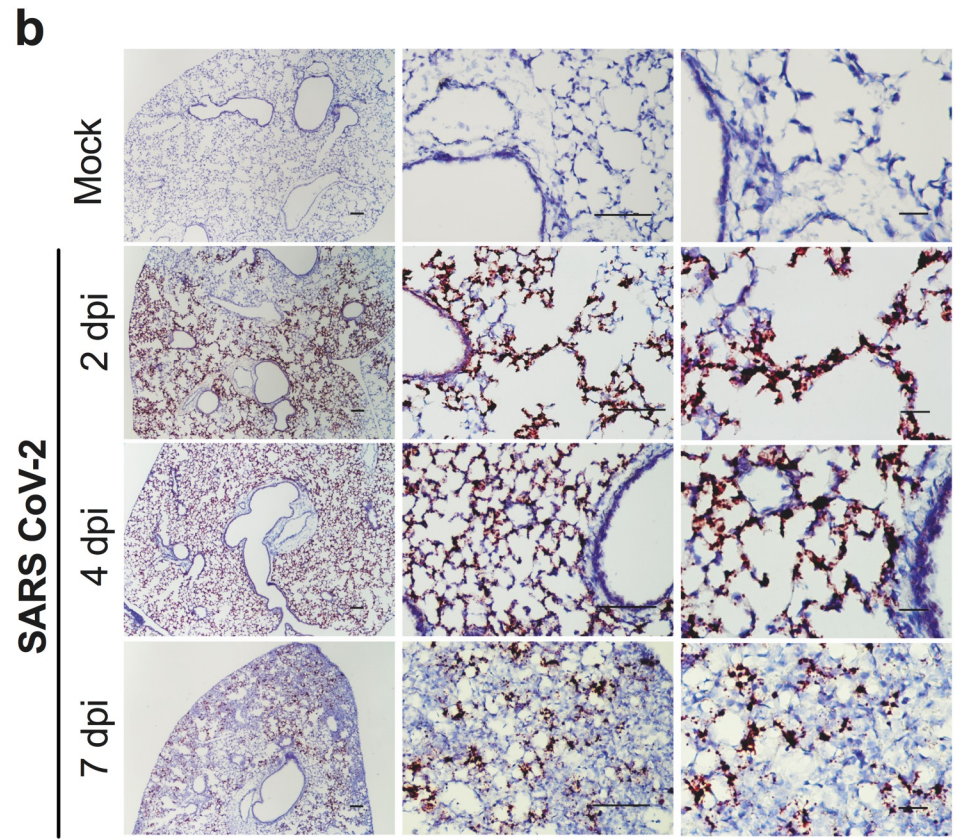

**Figure 2**

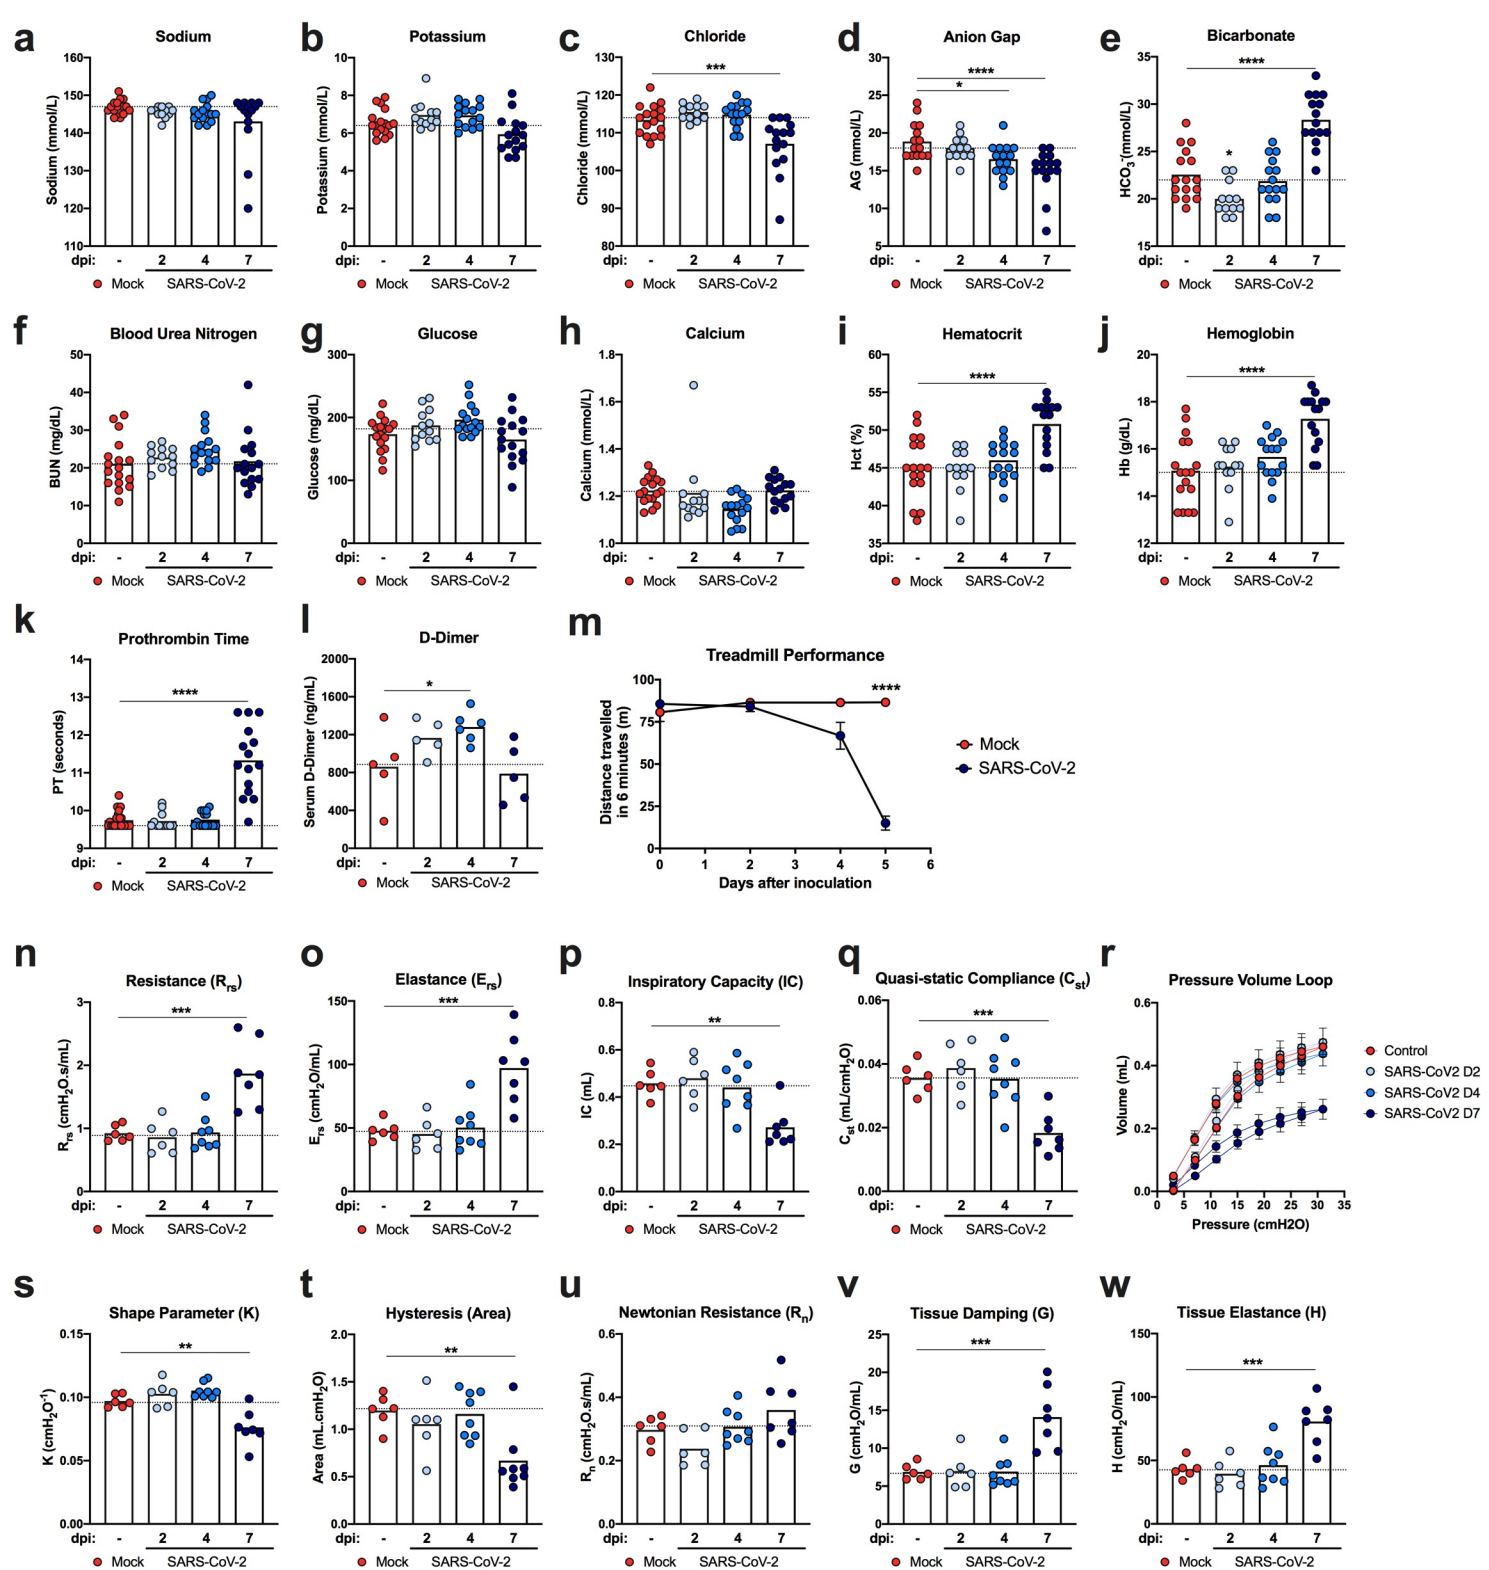

Figure 3



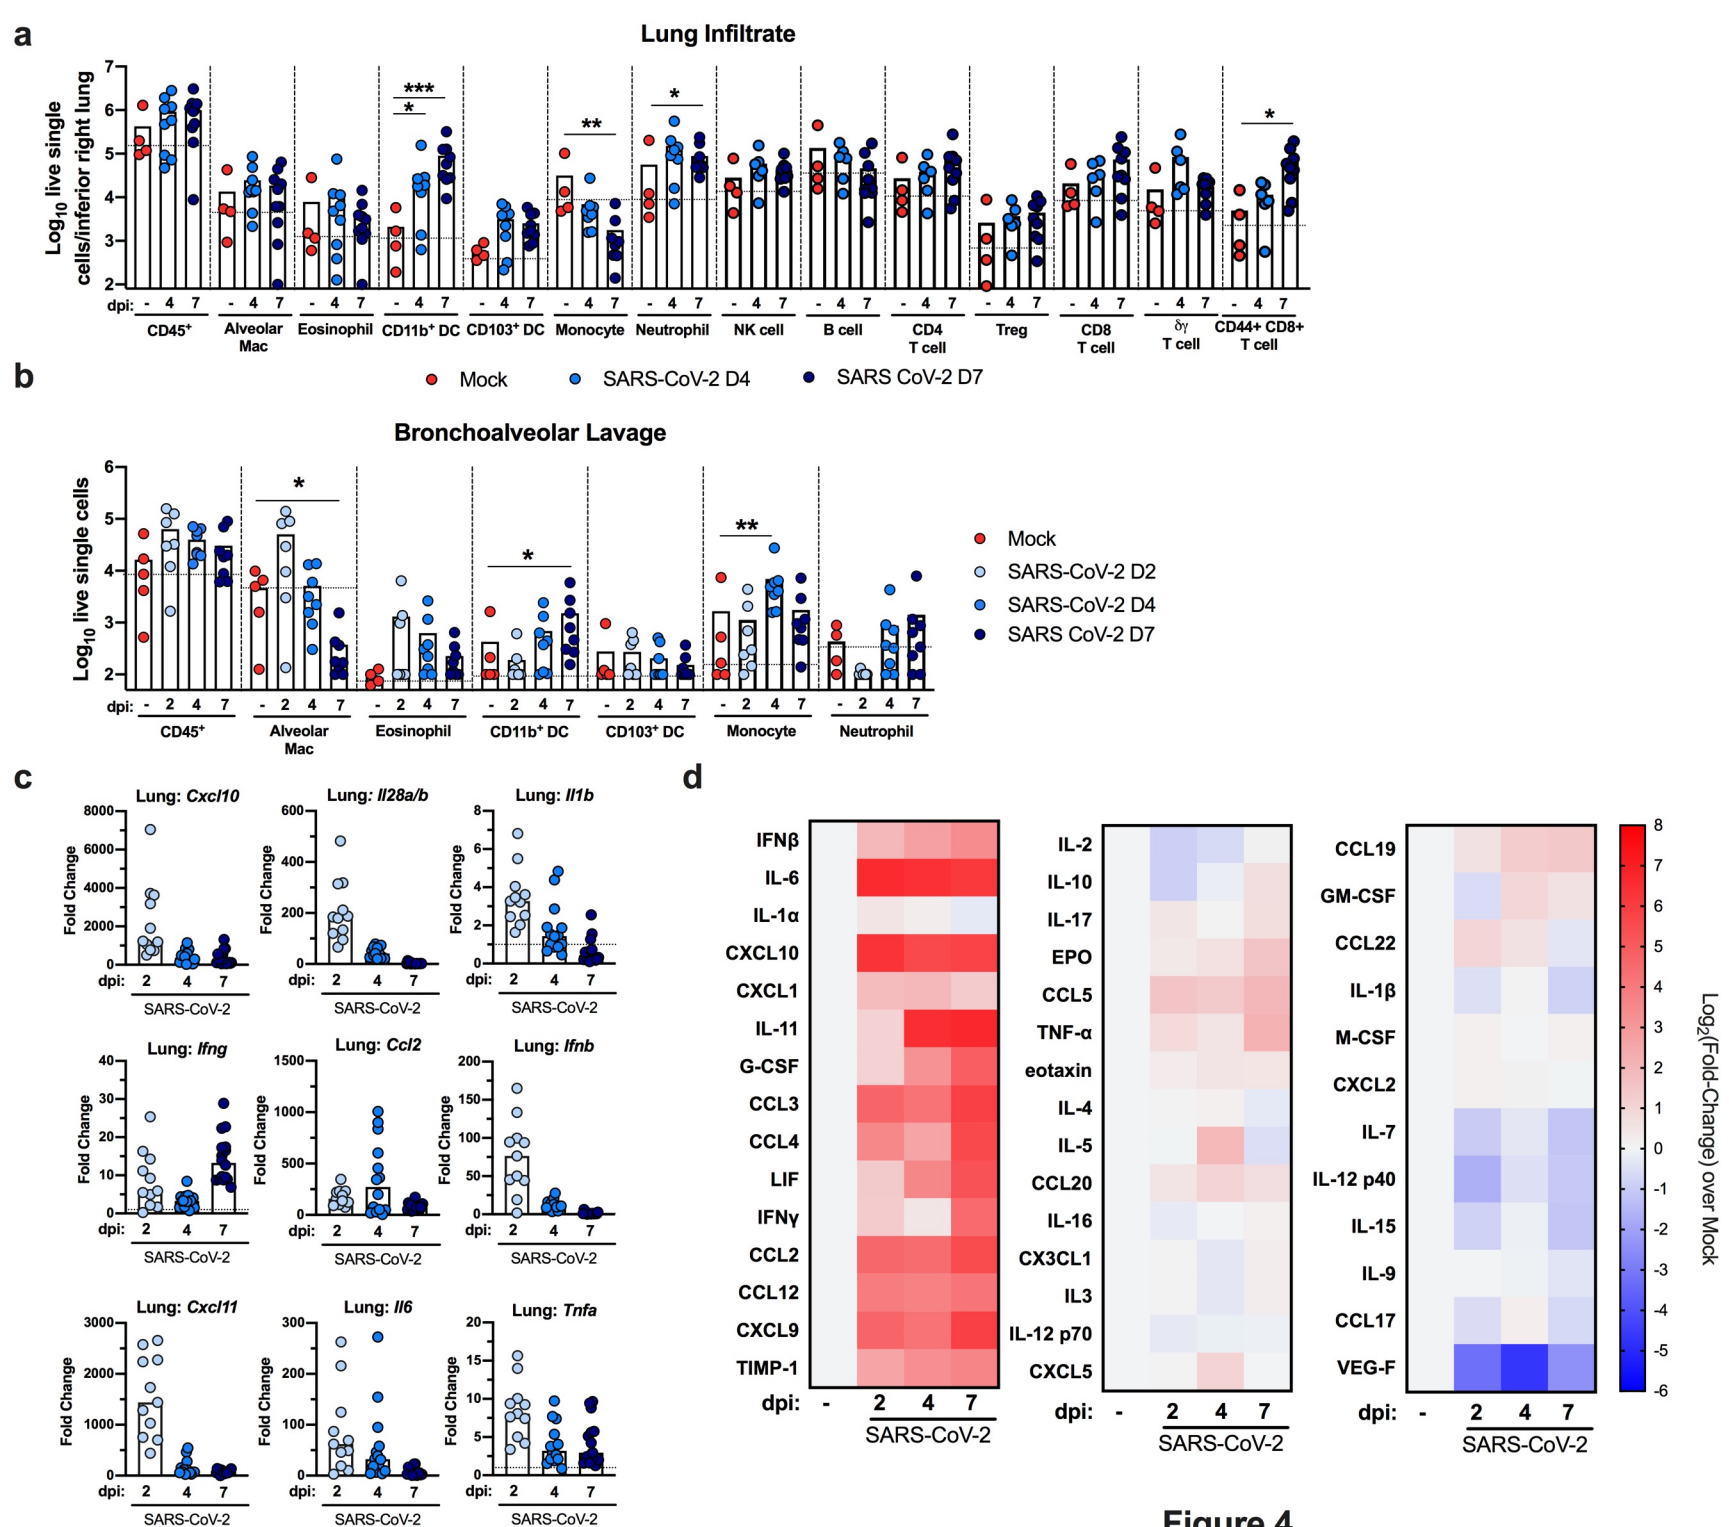

Figure 4



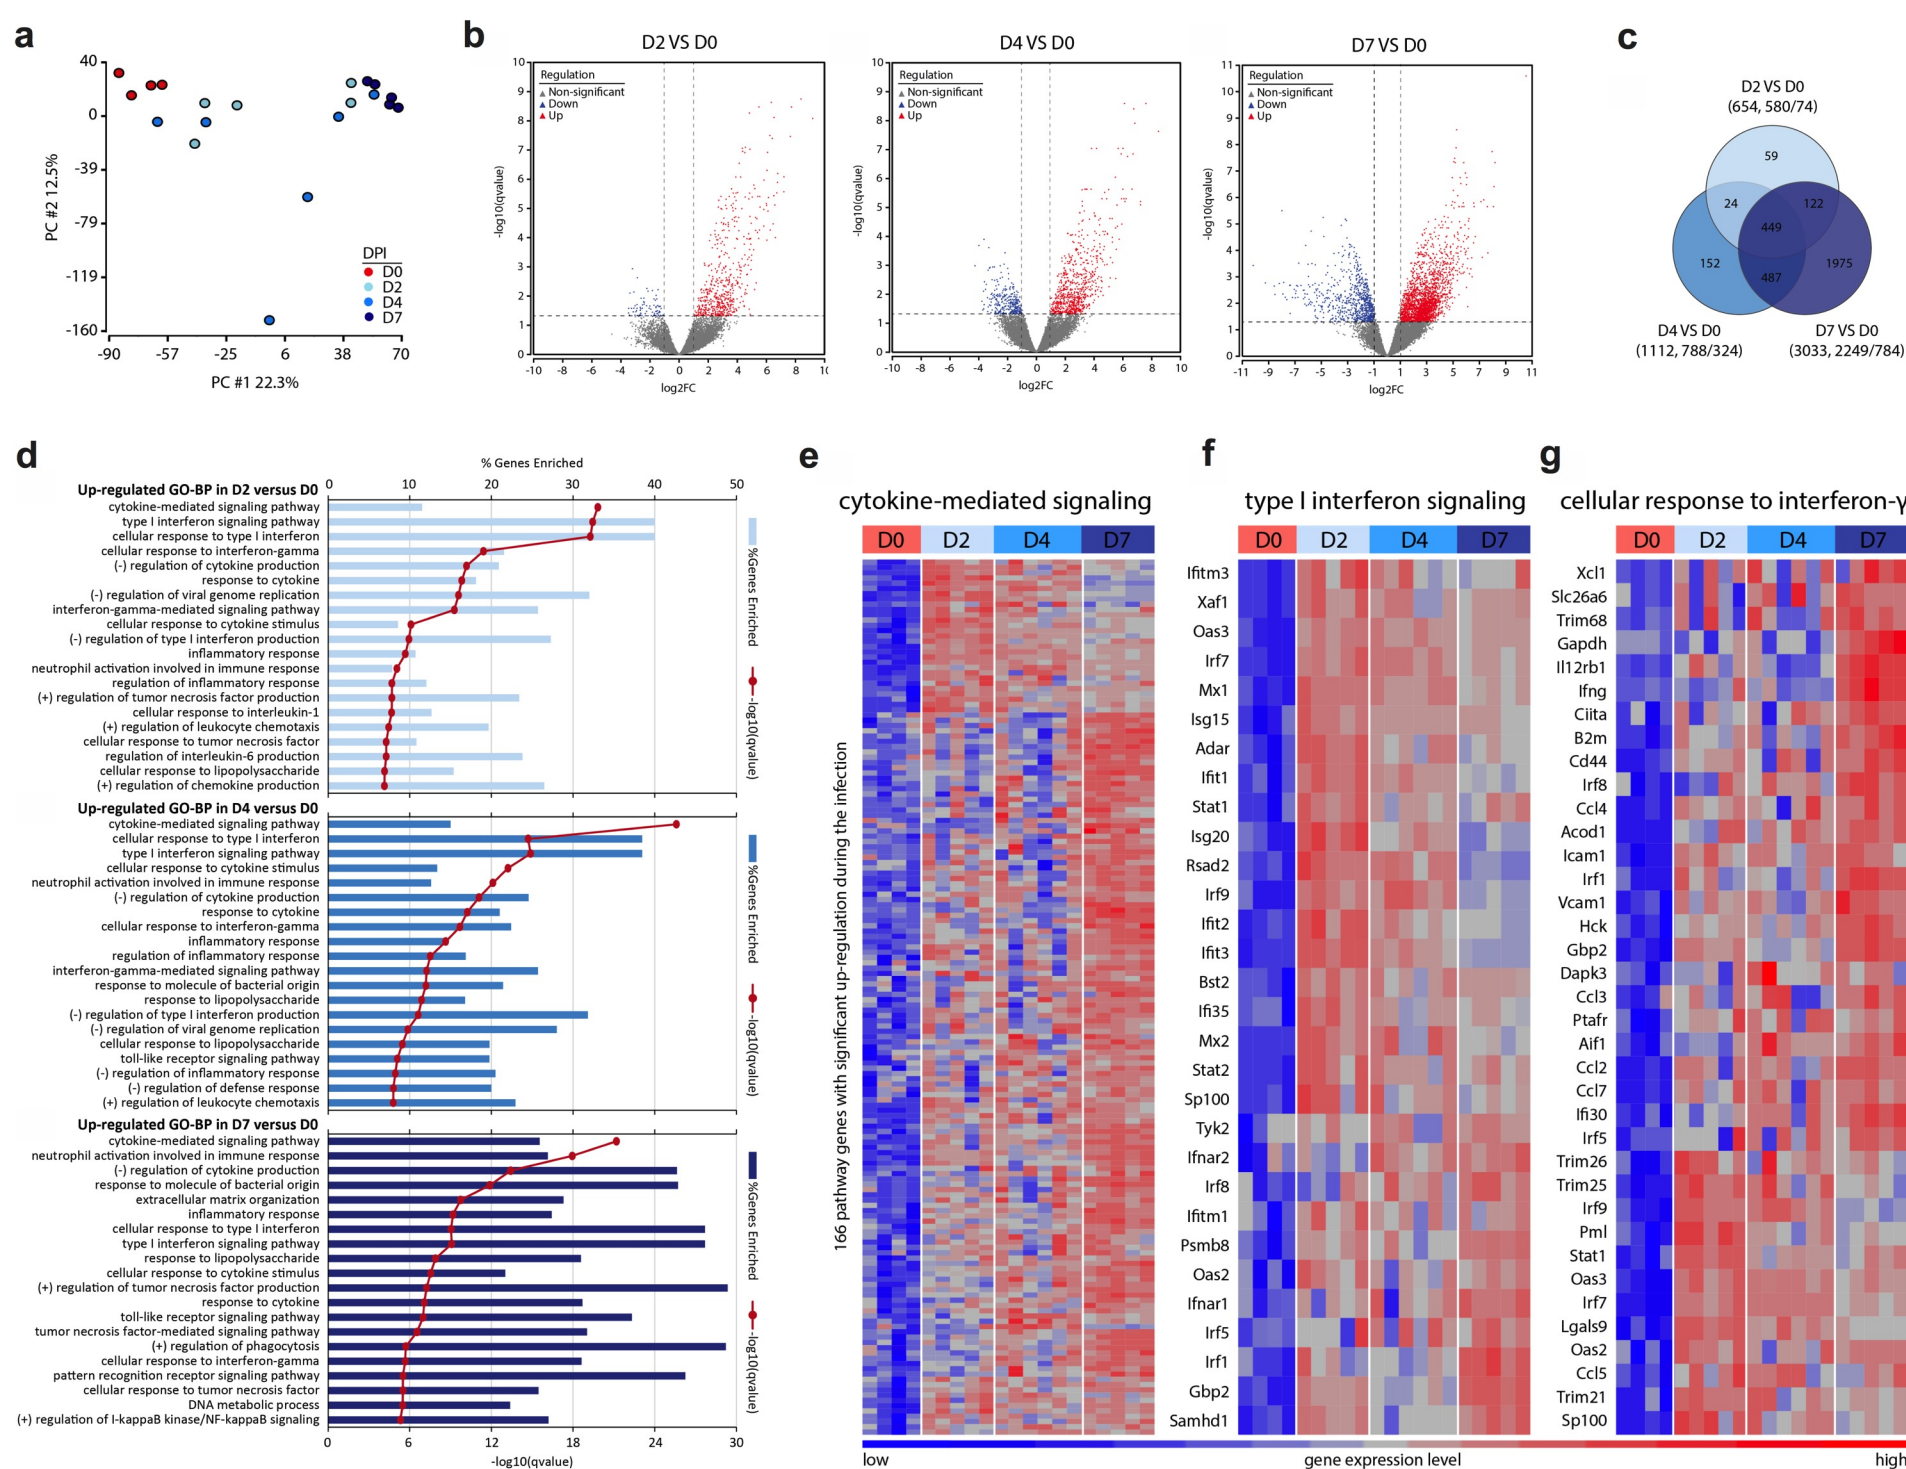

**a**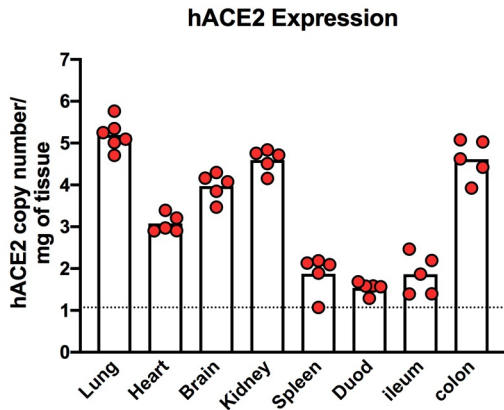**b**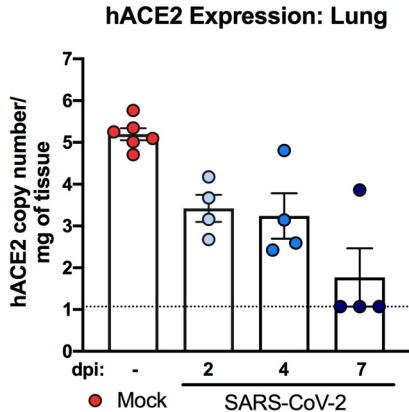**Extended Data Figure 1**

**SARS CoV-2**

7 dpi

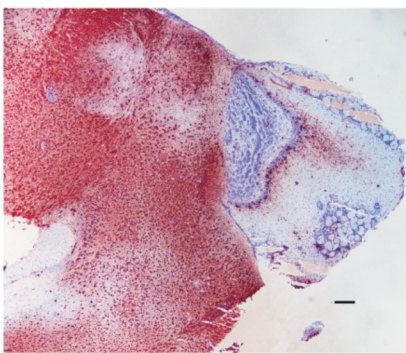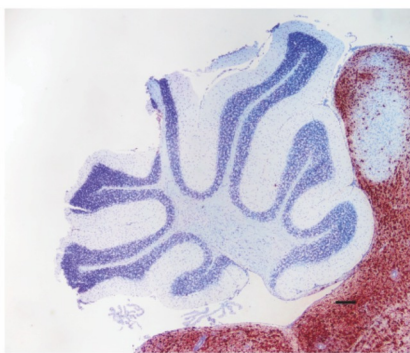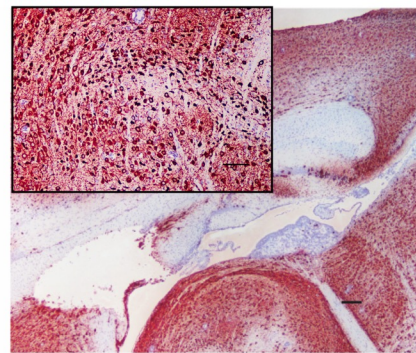

**SARS CoV-2**

7 dpi

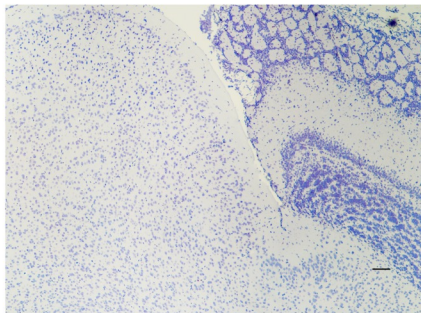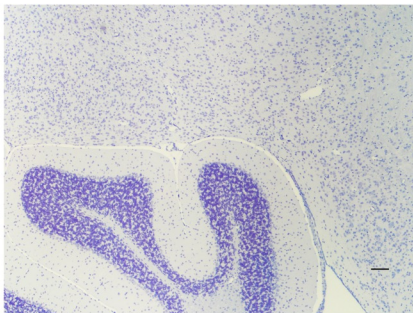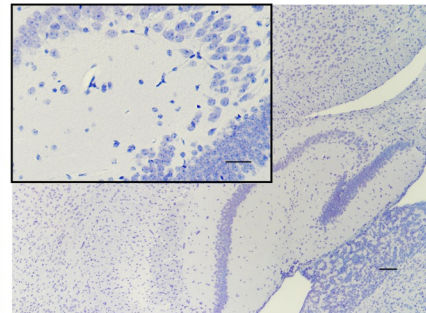

**Extended Data Figure 2**



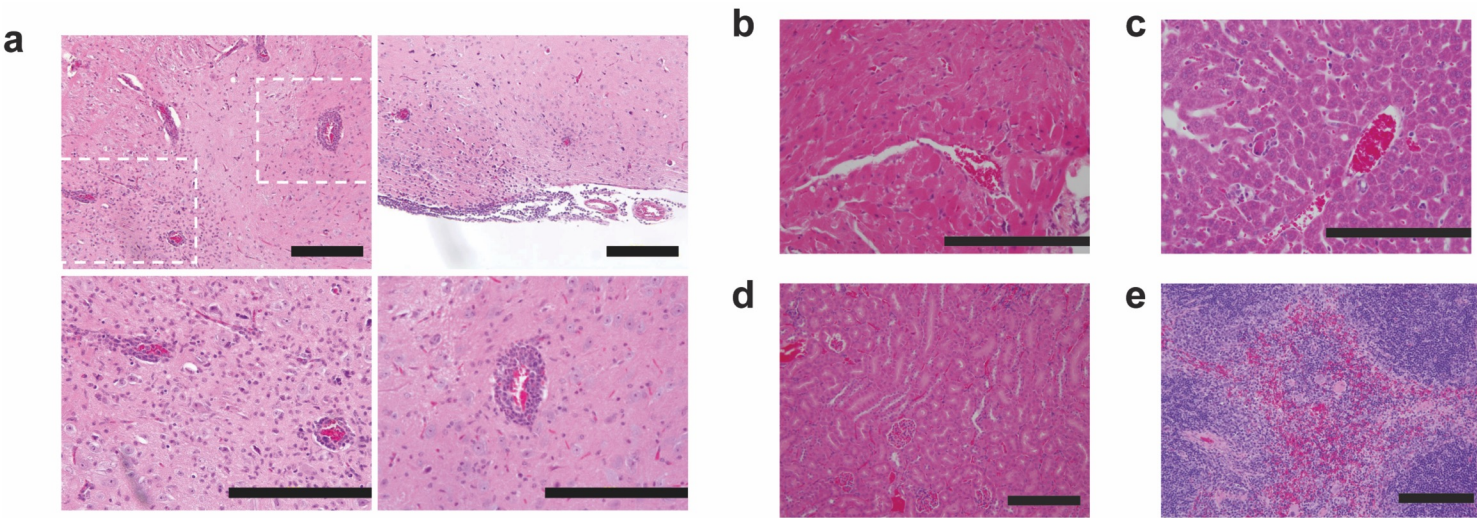

**Extended Data Figure 3**

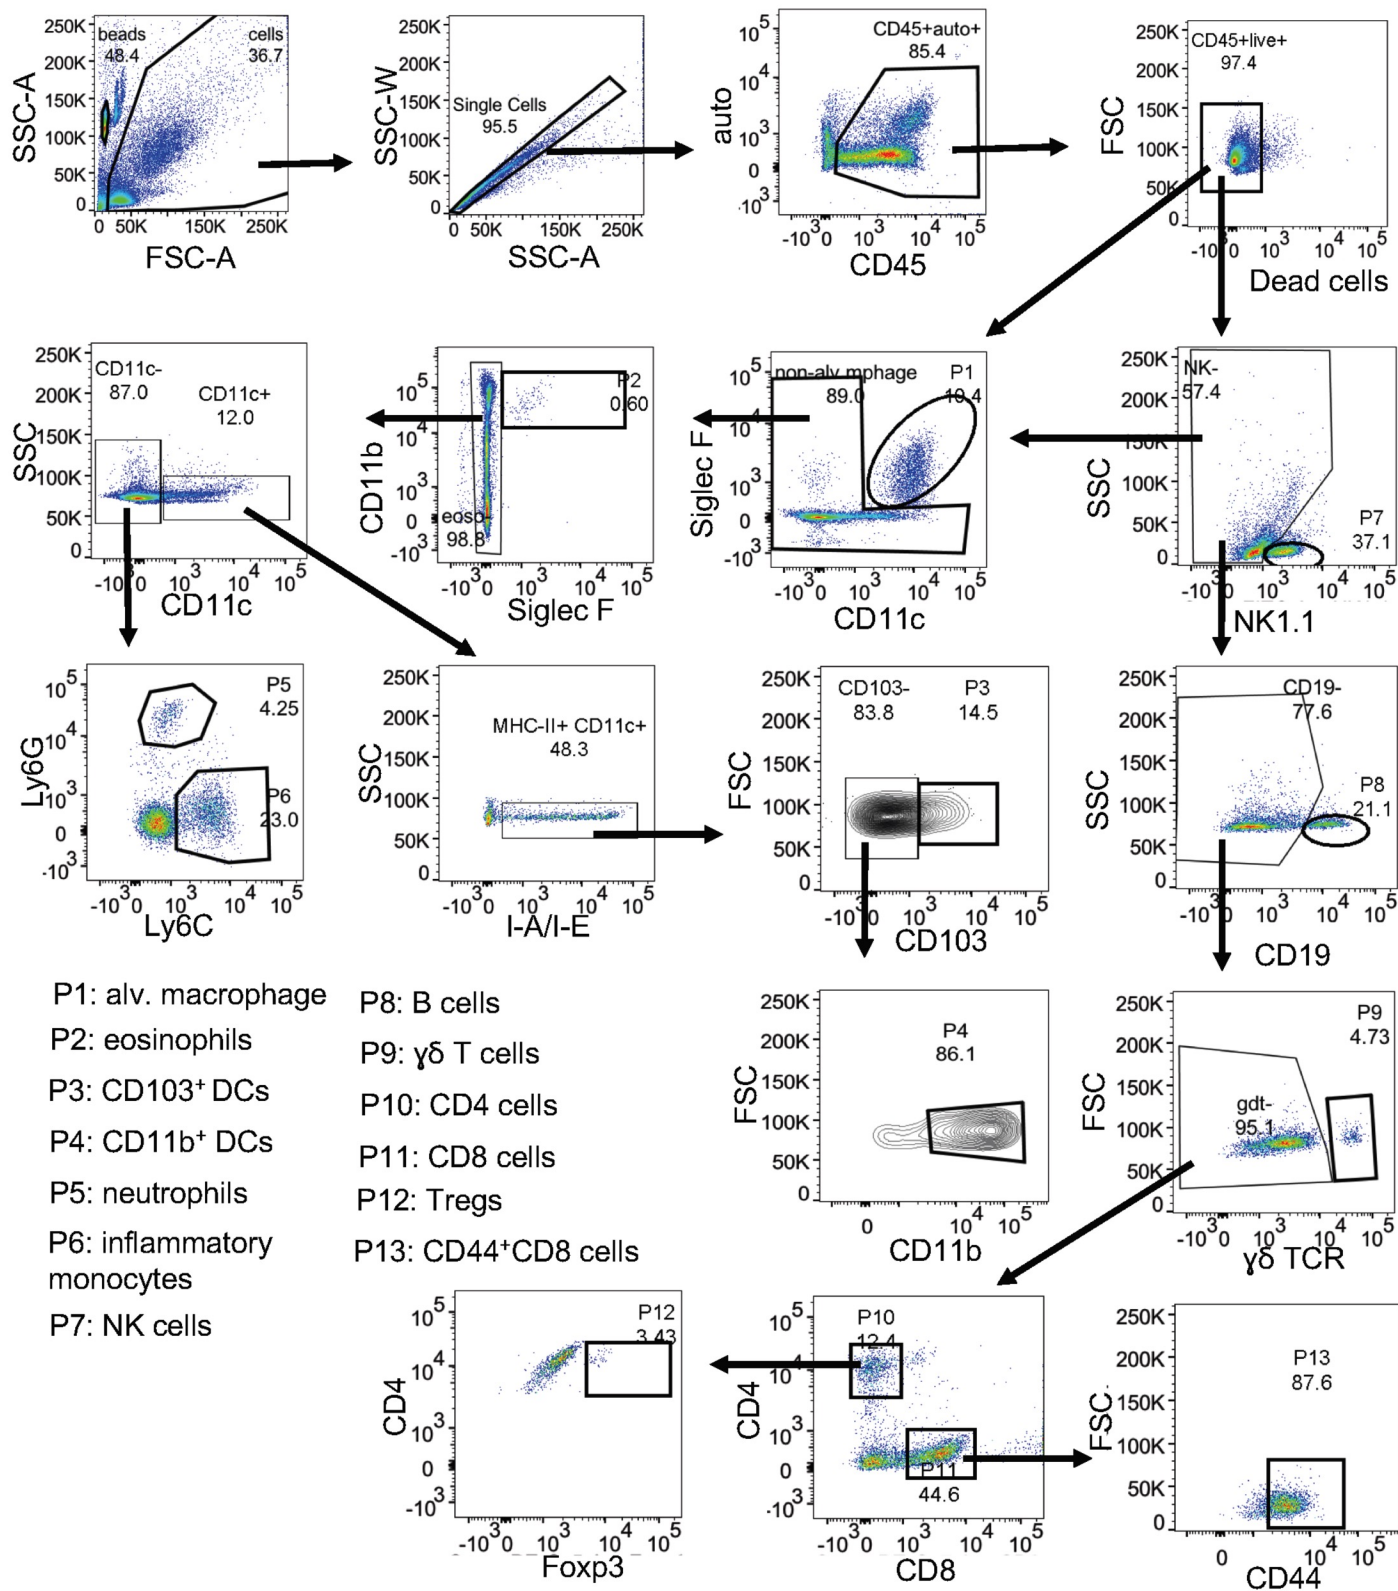

Extended Data Figure 4

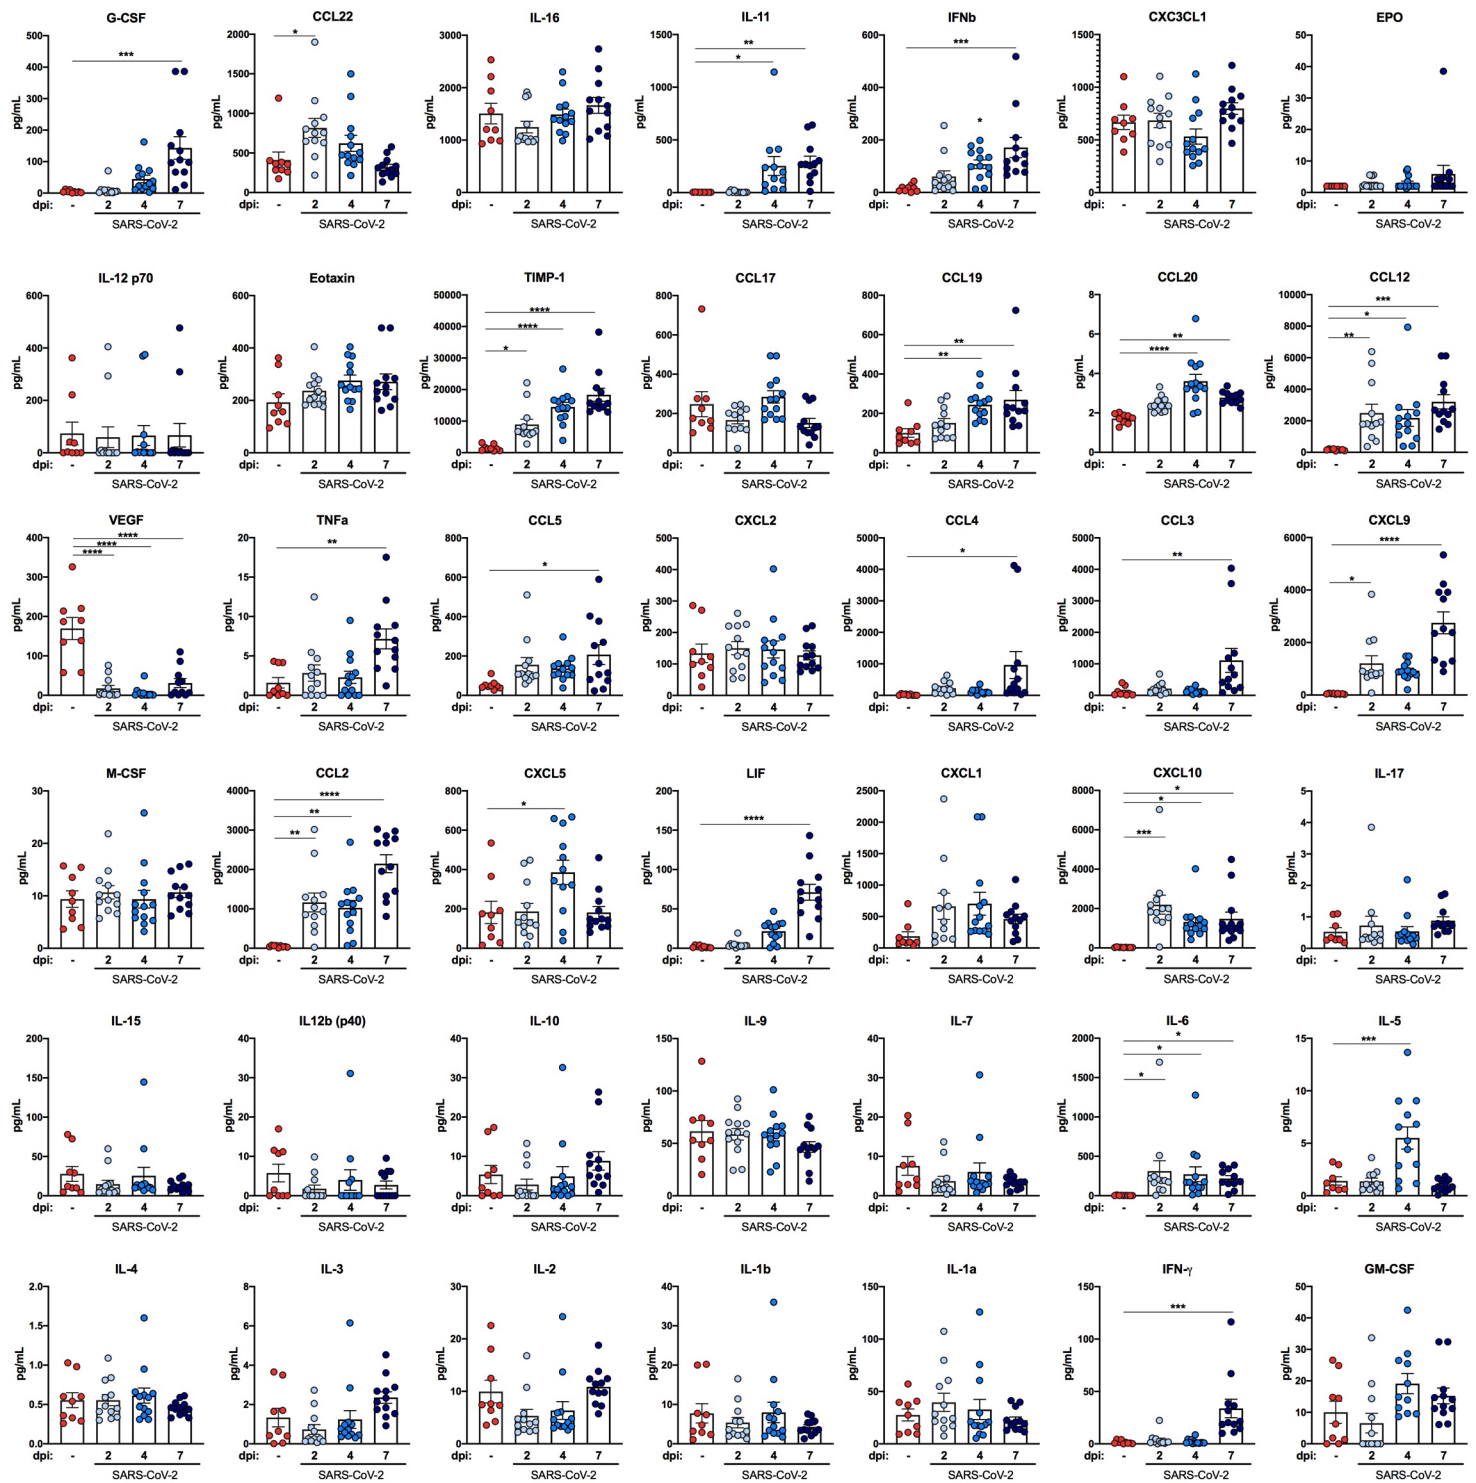

**Extended Data Figure 5**



**A** neutrophil activation involved in immune response

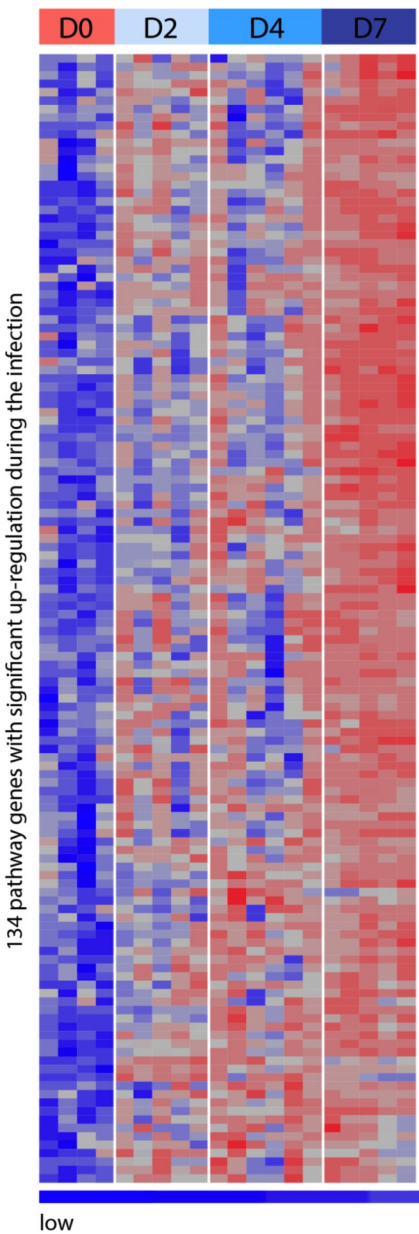

**B** toll-like receptor signaling pathway

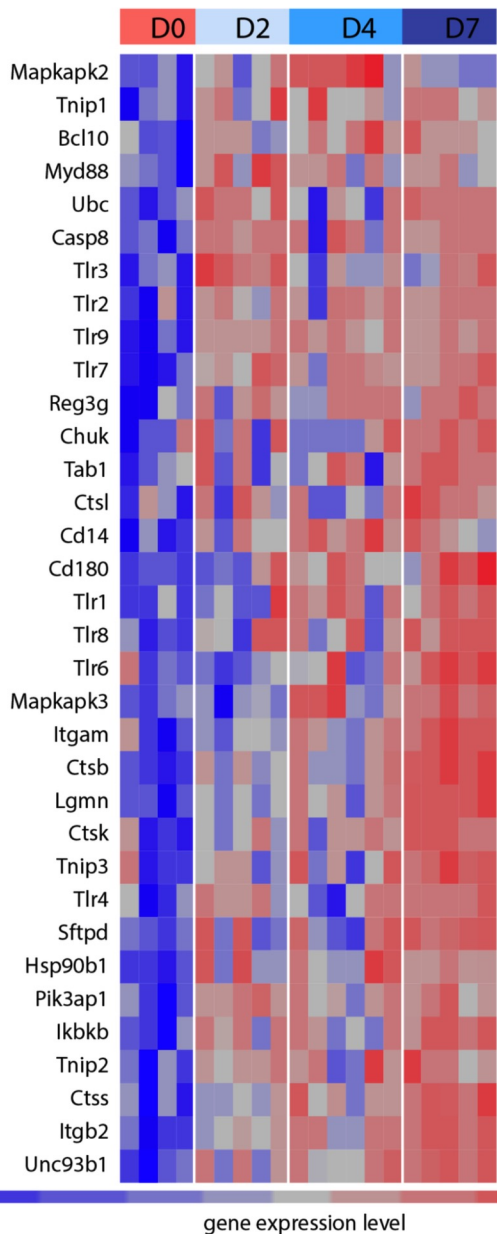

**C** negative regulation of viral genome replication

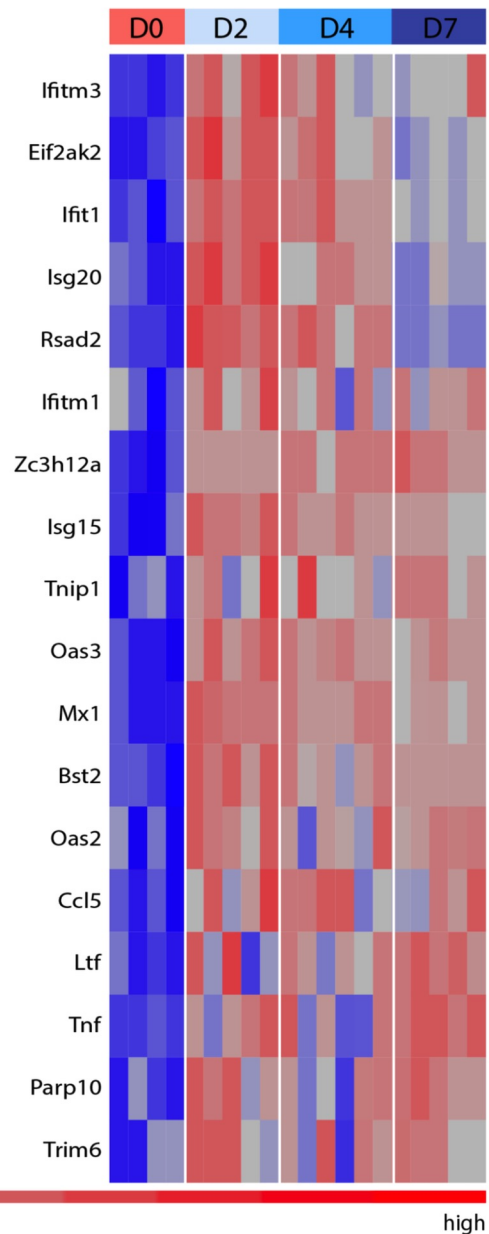

**Extended Data Figure 6**
